# Supplementary material for: Selective inhibition of EZH2 by ZLD1039 blocks H3K27methylation and leads to potent anti-tumor activity in breast cancer
Source: PubMed Central journal article supplement (PMC4751454; doi:10.1038/srep20864), 2016-02-12
Supplement: srep20864-s1.pdf [file srep20864-s1.pdf]

## Supplementary data

### **Selective inhibition of EZH2 by ZLD1039 blocks H3K27methylation and leads to potent anti-tumor activity in breast cancer**

Xuejiao Song<sup>1,+</sup>, Lidan Zhang<sup>1,+</sup>, Tiantao Gao<sup>1</sup>, Ningyu Wang<sup>1</sup>, Qiang Feng<sup>1,3</sup>, Xinyu You<sup>2</sup>,  
Tinghong Ye<sup>1</sup>, Qian Lei<sup>1</sup>, Yongxia Zhu<sup>1</sup>, Menghua Xiong<sup>1</sup>, Yong Xia<sup>1</sup>, Fangfang Yang<sup>1</sup>, Yaojie  
Shi<sup>1</sup>, Yuquan Wei<sup>1</sup> and Luoting Yu<sup>1,\*</sup>

<sup>1</sup>State Key Laboratory of Biotherapy and Cancer Center, West China Hospital, West China Medical School, Sichuan University, Chengdu 610041, China

<sup>2</sup>College of Chemical Engineering, Sichuan University, Chengdu, Sichuan 610065, China

<sup>3</sup>College of Chemistry and Life Science, Chengdu Normal University, Chengdu 611130, China

\*Corresponding authors.

Address: State Key Laboratory of Biotherapy and Cancer Center, West China Hospital, West China Medical School, Sichuan University, 17 #3rd Section, Ren Min South Road, Chengdu 610041, China.

Tel.: +86-28-8550-3817;

Fax: +86-28-8516-4060.

E-mail: yuluot@scu.edu.cn (L.-T. Yu)

<sup>+</sup>These authors contributed equally to this work

## Supplementary figures and legends

### Supplementary Figure S1

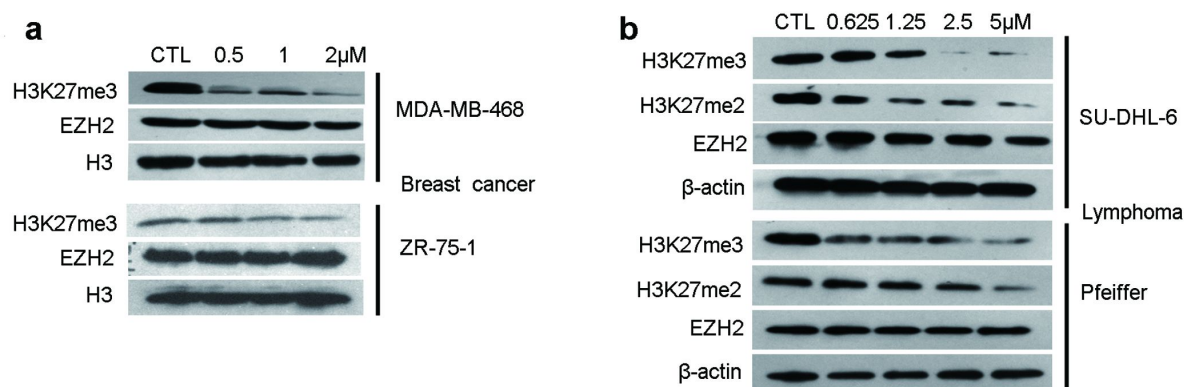

**Supplementary Figure S1. Effects of ZLD1039 on cellular global histone methylation in breast cancer and lymphoma cells.** (a) Dose-dependent inhibition of cellular H3K27 methylation by ZLD1039 for 4 days in ZR-75-1 and MDA-MB-468 cells. H3K27me3, EZH2, and H3 were detected by immunoblot. (b) ZLD1039 inhibited cellular H3K27 methylation in SU-DHL-6 and Pfeiffer cells in dose-dependent manner (4 days). H3K27me3, H3K27me2, EZH2, and H3 were detected by immunoblot.

## Supplementary Figure S2

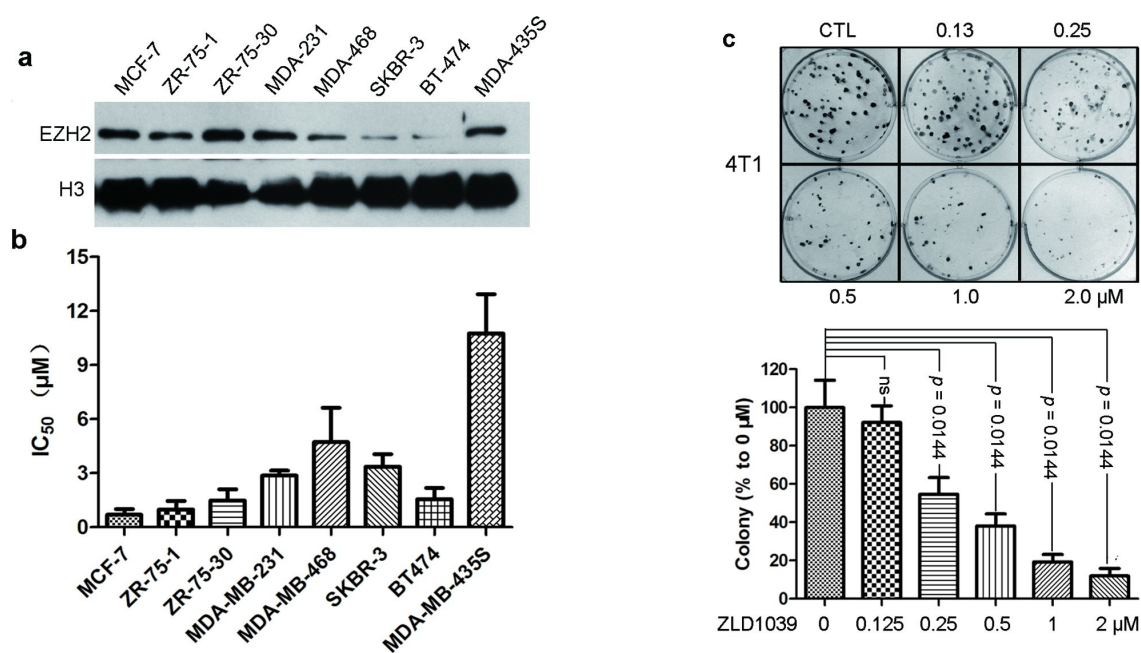

**Supplementary Figure S2. Growth inhibition of breast tumor cell lines after treatment with ZLD1039.** (a) The expression level of EZH2 in several breast cancer cell lines. (b) Cells were treated with ZLD1039 for 4 days and cell viability was determined by MTT assay, represented as growth IC<sub>50</sub> (µM). Results are expressed as mean ± SD of three independent experiments. (c) The effects of ZLD1039 on 4T1 cell colony formation after incubation for 14 days and quantification is shown in the down panel. Columns, mean; bars, SD; n=3. *P* values for comparison of two groups were determined by 2-tailed Student's *t*-test.

### Supplementary Figure S3

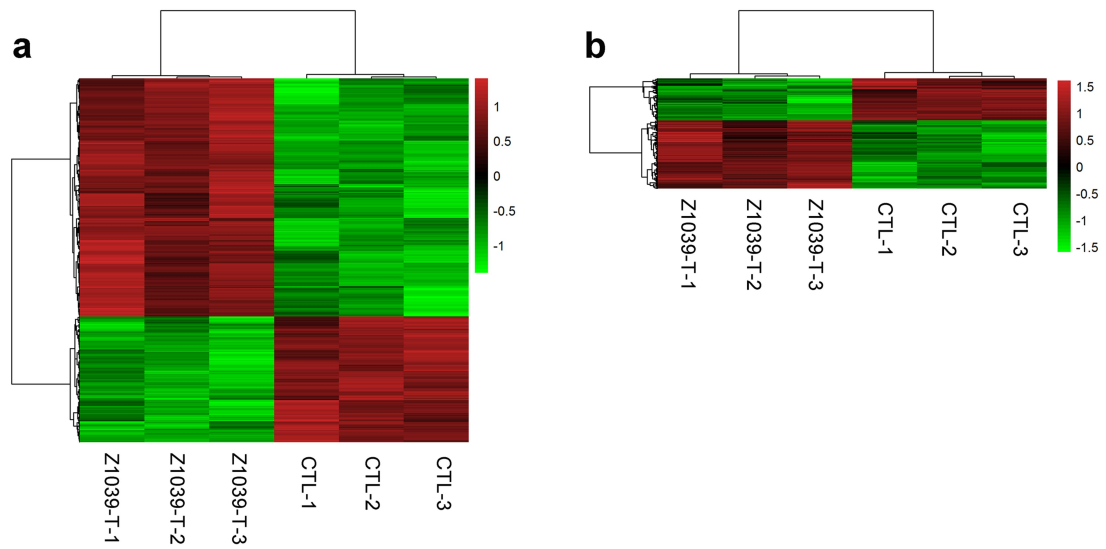

**Supplementary Figure S3. Gene expression array heat maps.** Heat maps of differently expressed genes in MCF-7 cells after EZH2 depletion by ZLD1039 treatment for 3 days (2 $\mu$ M) showing normalized expression value of three biological replicates. Changes in gene expression were filtered by fold-change > 2,  $P$  value < 0.05 (a) and fold-change > 2,  $P$  value < 0.01 (b).

## Supplementary Figure S4

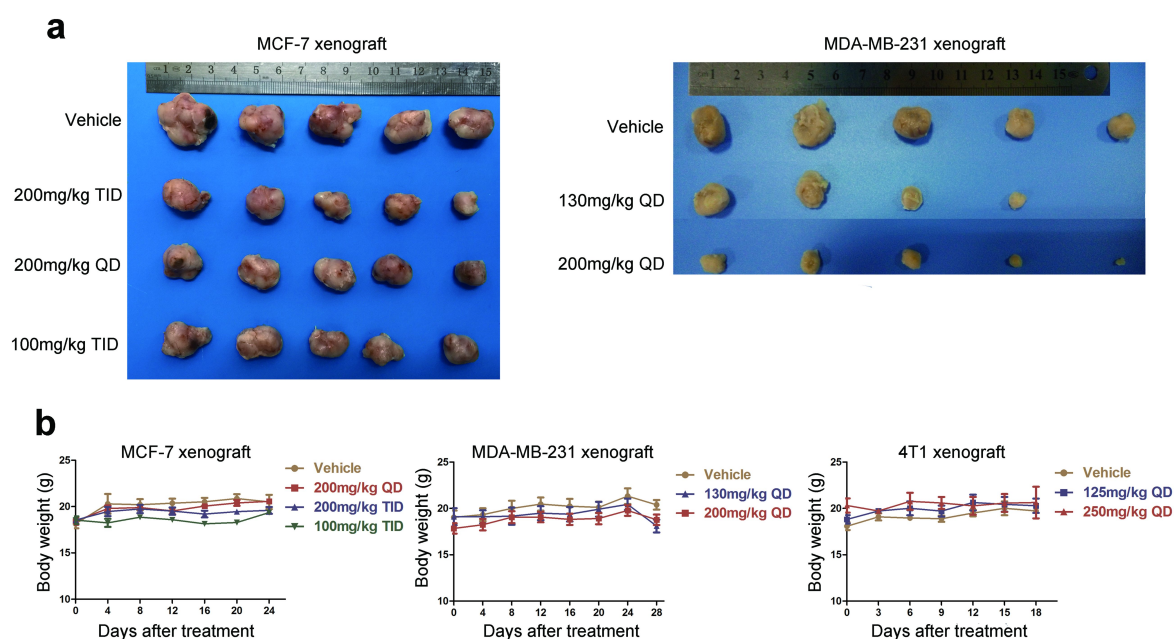

**Supplementary Figure S4. Antitumor efficacy of ZLD1039 in vivo.** (a) Representative photographs of subcutaneous tumors in each group of MCF-7 xenograft model (left) and MDA-MB-231 xenograft model (right). (b) Body weight of mice bearing breast tumor xenografts. There were no significant differences between treatment groups and vehicle group during the treatment cycle. Points, mean value; bars, SD.

## Supplementary Figure S5

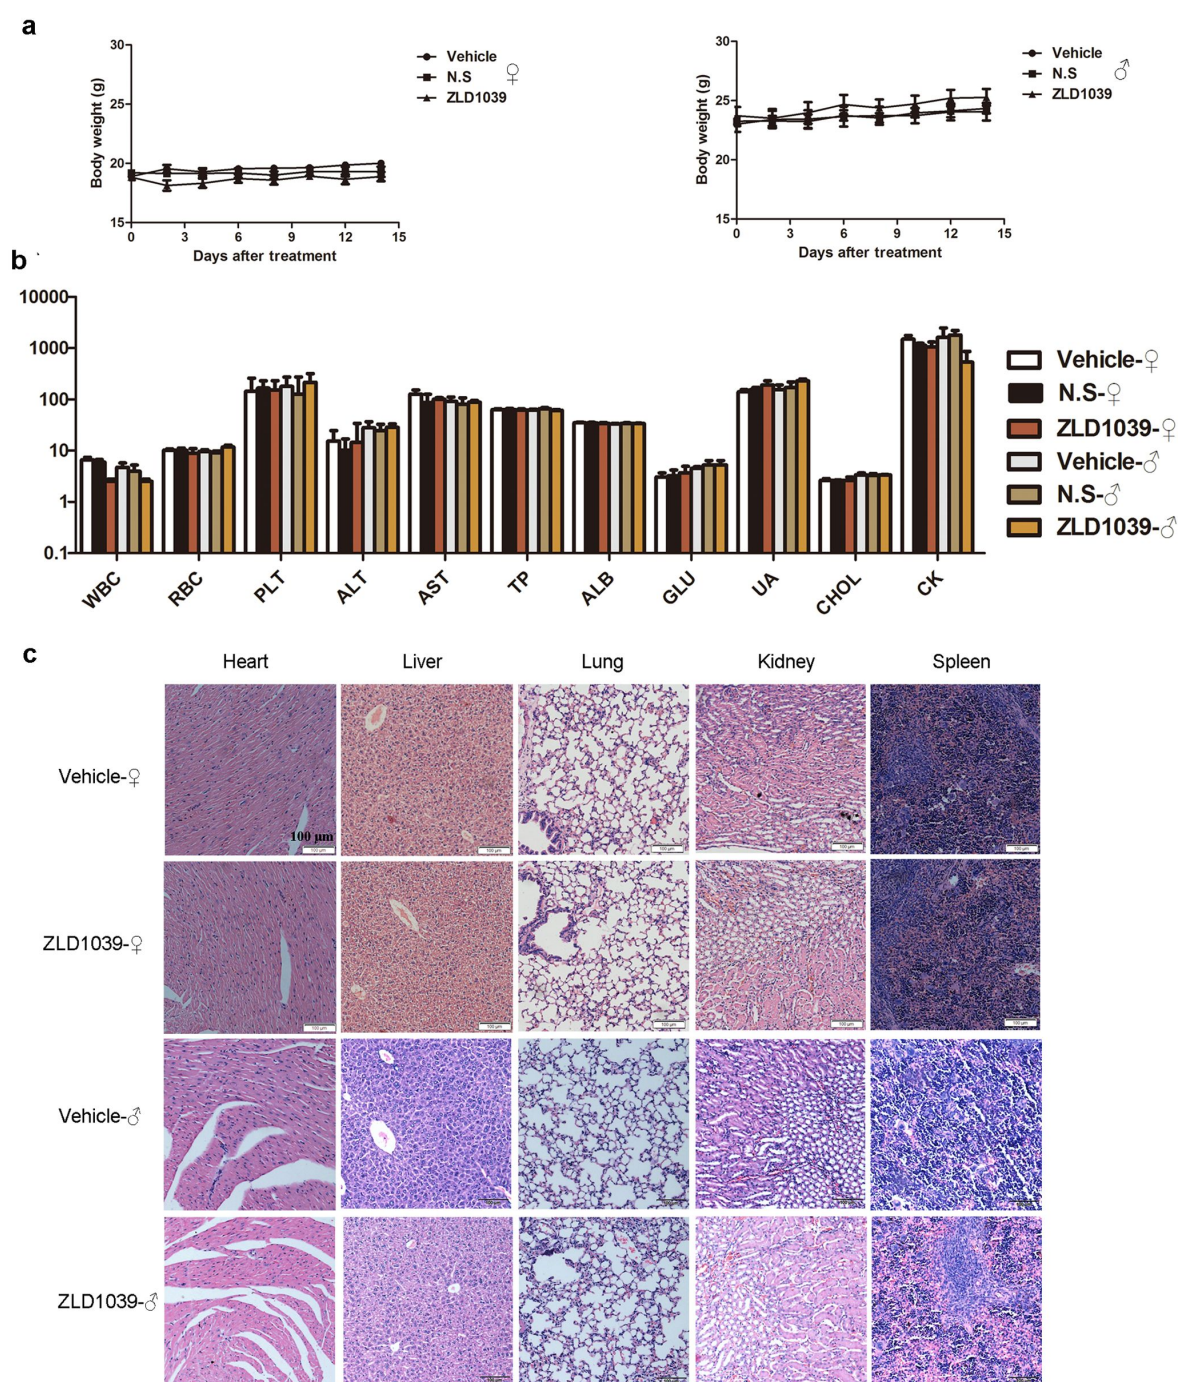

**Supplementary Figure S5. Safety profile of ZLD1039 in BALB/C mice.** (a) Data showing average body weight changes in the vehicle (n = 6) and ZLD1039 (2g/kg) treated mice (n = 6). Points, mean value; bars, SD. (b) Hematological and serum biochemical values of mice at day 14 (n = 6) for both vehicle and treated. Units of the parameters are as follows. WBC, PLT,  $10^9/L$ ; RBC,  $10^{12}/L$ ; TP, ALB, g/L; ALT, AST, CK, U/L; UA, GLU,  $\mu M$ ; CHOL, mM. (c) ZLD1039 did not cause obvious pathologic abnormalities in normal tissues. H&E staining of

paraffin-embedded sections of the heart, liver, spleen, lung and kidney. Representative images of each group are shown.

## Supplementary Tables

**Supplementary Table S1.** The list of antibodies used in the study

| Antigen          | Host   | Company        | Cat#/code  |
|------------------|--------|----------------|------------|
| EZH2             | Rabbit | Cell Signaling | 5246       |
| H3               | Rabbit | Abcam          | Ab1791     |
| H3K27Me3         | Rabbit | Millpore       | 17-622     |
| H3K27Me2         | Rabbit | BeacomBio      | BIO2014917 |
| H3K9Me3          | Rabbit | Millpore       | 07-442     |
| H3K4Me3          | Mouse  | Millpore       | 05-1339    |
| H3K4Me2          | Mouse  | Millpore       | 05-1249    |
| Cyclin D         | Mouse  | Cell Signaling | 2926       |
| Cyclin E         | Mouse  | BD             | 551160     |
| CDK1             | Rabbit | Abcam          | ab32384    |
| CDK2             | Rabbit | Cell Signaling | 2546       |
| CDK4             | Mouse  | Abcam          | ab108357   |
| P21              | Rabbit | Abcam          | ab10919    |
| BAX              | Rabbit | Cell Signaling | 5023       |
| BCL-2            | Rabbit | Cell Signaling | 2870S      |
| Caspase 3        | Rabbit | Cell Signaling | 9662       |
| Caspase 9        | Mouse  | Cell Signaling | 9508       |
| Cleaved-Caspase9 | Rabbit | Cell Signaling | 7237       |
| Ki67             | Rabbit | Abcam          | ab16667    |
| $\beta$ -actin   | Mouse  | Zsgb-Bio       | TA-09      |



**Supplementary Table S2.** The list of primers used in the study

| <b>qRT-PCR Primers</b> |           |
|------------------------|-----------|
| Genes                  | AB no.    |
| CDH1                   | HQP023466 |
| CDKN1C                 | HQP000356 |
| CDKN2A                 | HQP000369 |
| RUNX3                  | HQP021393 |

  

| <b>siRNA sequence</b> |                       |
|-----------------------|-----------------------|
| Gene                  | Target sequences      |
| EZH2-siRNA1           | GACUCUGAAUGCAGUUGCU   |
| EZH2-siRNA2           | GCAAATTCTCGGTGTCAAA   |
| EZH2-siRNA3           | AUCAGCUCGUCUGAACCUCUU |

**Supplementary Table S3.** HMT Profiling of ZLD1039 with a panel of HMT enzymes

| Enzyme        | ZLD1<br>039<br>IC <sub>50</sub> (n<br>M) | Fold-sele<br>ctivity | Positive<br>control | IC <sub>50</sub> (<br>μM) | Assay with enzyme<br>complex    | Substrate           |
|---------------|------------------------------------------|----------------------|---------------------|---------------------------|---------------------------------|---------------------|
| EZH2<br>WT    | 5.6                                      | 1                    | SAH                 | 21                        | EZH2/EED/SUZ12/RbAp<br>48/AEBP2 | H3[21-24]           |
| EZH2<br>A677G | 4.0                                      | 0.71                 | SAH                 | 21                        | EZH2/EED/SUZ12/RbAp<br>48/AEBP2 | H3[21-24]           |
| EZH2<br>Y641F | 15                                       | 2.68                 | SAH                 | 66                        | EZH2/EED/SUZ12/RbAp<br>48/AEBP2 | H3[21-24]           |
| EZH2<br>Y641S | 71                                       | 12.68                | SAH                 | 20                        | EZH2/EED/SUZ12/RbAp<br>48/AEBP2 | H3[21-24]           |
| EZH2<br>Y641C | 210                                      | 37.5                 | SAH                 | 111                       | EZH2/EED/SUZ12/RbAp<br>48/AEBP2 | H3[21-24]           |
| EZH1          | 81                                       | 14.46                | SAH                 | 79                        | EZH1/EED/SUZ12/RbAp<br>48/AEBP2 | H3[21-24]           |
| MLL1<br>G9a   | 26,50<br>0                               | 4732                 | Chaetocin           | 0.13                      | MLL1/WDR5/Ash2L/Rb<br>BP5       | H3[1-21]            |
|               | >100,<br>000                             | >17,000              | SAH                 | 0.60                      | G9a                             | H3[1-21]            |
| PRDM9         | >100,<br>000                             | >17,000              | SAH                 | 50                        | PRDM9                           | H3[1-21]            |
| SETD7         | >100,<br>000                             | >17,000              | SAH                 | 1.96                      | SETD7                           | H3[1-21]            |
| SYMD2         | >100,<br>000                             | >17,000              | SAH                 | 1                         | SYMD2                           | H3[1-21]            |
| SUV39H<br>1   | >100,<br>000                             | >17,000              | Chaetocin           | 0.68                      | SUV39H1                         | H3[1-21]            |
| SUV39H<br>2   | >100,<br>000                             | >17,000              | SAH                 | 3                         | SUV39H2                         | H3[1-21]            |
| SETD8         | >100,<br>000                             | >17,000              | SAH                 | 71                        | SETD8                           | H3[6-27]            |
| DOT1L         | >100,<br>000                             | >17,000              | SAH                 | 0.28                      | DOT1L                           | Oligonucleo<br>some |
| NSD3          | >100,<br>000                             | >17,000              | Chaetocin           | 0.59                      | NSD3                            | Oligonucleo<br>some |

**Supplementary Table S4.** Pharmacokinetic parameters for ZLD1039 in Sprague–Dawley rats

| <b>Parameter</b>            | <b>IV(2mg/kg)</b> | <b>PO (100mg/kg)</b> |
|-----------------------------|-------------------|----------------------|
| AUC <sub>0-t</sub> (ug*h )  | 556.4             | 4546.1               |
| AUC <sub>0-inf</sub> (ug*h) | 556.4             | 12994.2              |
| t <sub>1/2</sub> (h)        | 0.488             | 4.369                |
| T <sub>max</sub> (h)        |                   | 0.25                 |
| C <sub>max</sub> (ug/L)     |                   | 482.1                |
| MRT (h)                     | 0.704             | 3.249                |
| CL (L/h/kg)                 | 0.004             |                      |
| F(%)                        |                   | 16.3                 |

Note: PO= oral delivery, IV= intravenous, AUC= area under the curve (measurement of exposure), t<sub>1/2</sub>= half life, T<sub>max</sub>=the time required to reach the maximum plasma concentration, MRT: the mean residence time, CL=plasma clearance, C<sub>max</sub>= maximum plasma concentration, F: oral bioavailability.

**Supplementary Table S5.** Microarray data including up-regulated and down-regulated genes

| <b>GS</b>    | <b>FC</b> | <b>T-1</b> | <b>T-2</b> | <b>T-3</b> | <b>CTL-1</b> | <b>CTL-2</b> | <b>CTL-3</b> | <b>P value</b> |
|--------------|-----------|------------|------------|------------|--------------|--------------|--------------|----------------|
| FAM111<br>B  | 9.04      | 6.097      | 6.226      | 6.594      | 2.964        | 3.290        | 3.163        | 0.0002         |
| LGR5         | 6.76      | 6.769      | 6.977      | 7.517      | 4.072        | 4.703        | 4.249        | 0.0008         |
| FAM111<br>B  | 6.69      | 5.596      | 6.372      | 6.363      | 3.113        | 3.614        | 3.462        | 0.0021         |
| POLE2        | 6.45      | 8.112      | 8.045      | 8.387      | 5.842        | 5.170        | 5.408        | 0.0011         |
| SPRR1B       | 6.35      | 8.138      | 8.081      | 8.214      | 5.198        | 5.468        | 5.722        | 0.0019         |
| CCNE2        | 5.30      | 5.768      | 5.709      | 6.457      | 3.388        | 3.793        | 3.631        | 0.0034         |
| E2F8         | 4.59      | 7.029      | 6.986      | 7.352      | 5.379        | 4.532        | 4.745        | 0.0053         |
| MNS1         | 4.56      | 6.738      | 7.249      | 6.875      | 4.870        | 4.686        | 4.778        | 0.0022         |
| FABP5        | 4.20      | 9.689      | 9.780      | 10.095     | 7.913        | 7.391        | 8.010        | 0.0016         |
| CDKN1C       | 4.08      | 8.767      | 8.553      | 9.041      | 6.897        | 6.758        | 6.656        | 0.4445         |
| CDCA7        | 4.05      | 10.541     | 10.562     | 10.804     | 8.809        | 8.140        | 8.818        | 0.0061         |
| SKP2         | 4.03      | 7.985      | 7.608      | 8.613      | 6.113        | 6.012        | 6.224        | 0.0183         |
| LMNB1        | 3.92      | 8.773      | 8.588      | 9.161      | 6.960        | 6.810        | 6.895        | 0.0050         |
| DSCC1        | 3.90      | 8.535      | 8.755      | 8.775      | 6.485        | 6.940        | 6.723        | 0.0007         |
| CDKN2A       | 3.88      | 5.055      | 5.845      | 5.950      | 3.684        | 4.019        | 3.354        | 0.0840         |
| CDKN2A       | 3.88      | 9.221      | 9.702      | 9.180      | 7.538        | 7.444        | 7.303        | 0.1169         |
| HIBCH        | 3.87      | 8.860      | 9.474      | 8.935      | 7.234        | 7.218        | 7.036        | 0.0057         |
| RRM2         | 3.84      | 10.857     | 10.685     | 10.960     | 9.057        | 8.555        | 9.022        | 0.0019         |
| DLGAP5       | 3.76      | 7.852      | 8.531      | 8.274      | 6.372        | 6.441        | 6.176        | 0.0050         |
| MYB          | 3.76      | 7.279      | 7.585      | 7.810      | 5.744        | 5.673        | 5.567        | 0.0033         |
| DSCC1        | 3.70      | 8.780      | 9.072      | 9.271      | 7.243        | 7.204        | 7.049        | 0.0021         |
| ANKRD3<br>2  | 3.69      | 6.187      | 6.612      | 6.860      | 4.699        | 4.857        | 4.505        | 0.0035         |
| NDC80        | 3.66      | 7.853      | 8.254      | 7.548      | 6.329        | 5.753        | 5.992        | 0.0025         |
| CDH1         | 3.64      | 7.489      | 8.120      | 7.936      | 6.002        | 6.166        | 5.838        | 0.0878         |
| LMNB1        | 3.56      | 7.759      | 7.825      | 8.085      | 5.738        | 6.122        | 6.285        | 0.0015         |
| LMNB1        | 3.56      | 7.756      | 7.822      | 8.082      | 5.747        | 6.119        | 6.276        | 0.0013         |
| GINS2        | 3.54      | 9.407      | 9.198      | 9.418      | 7.551        | 6.989        | 7.885        | 0.0140         |
| SPC25        | 3.51      | 9.398      | 9.597      | 9.503      | 7.729        | 7.470        | 7.849        | 0.0007         |
| ANKRD3<br>2  | 3.51      | 5.759      | 6.296      | 6.708      | 4.658        | 4.688        | 4.055        | 0.0080         |
| KIF20A       | 3.48      | 9.442      | 9.492      | 9.510      | 7.643        | 7.801        | 7.593        | 0.0005         |
| CDC7         | 3.41      | 6.652      | 7.076      | 6.850      | 5.237        | 5.143        | 4.900        | 0.0005         |
| FAM102<br>B  | 3.39      | 7.575      | 7.545      | 7.805      | 5.962        | 5.906        | 5.789        | 0.0002         |
| ESCO2        | 3.38      | 7.763      | 8.229      | 8.085      | 6.106        | 6.538        | 6.158        | 0.0008         |
| KIAA010<br>1 | 3.36      | 11.034     | 11.004     | 10.932     | 9.125        | 9.119        | 9.462        | 0.0025         |
| TMX1         | 3.33      | 6.946      | 7.462      | 7.416      | 5.606        | 5.489        | 5.569        | 0.0070         |

|                    |      |        |        |        |       |       |       |        |
|--------------------|------|--------|--------|--------|-------|-------|-------|--------|
| MCM10              | 3.32 | 7.123  | 7.451  | 7.573  | 5.759 | 5.678 | 5.539 | 0.0017 |
| MCM10              | 3.32 | 7.443  | 7.417  | 7.503  | 5.782 | 5.861 | 5.504 | 0.0026 |
| KIF15              | 3.31 | 6.120  | 6.448  | 6.378  | 4.819 | 4.653 | 4.257 | 0.0021 |
| RUNX3              | 3.28 | 11.108 | 11.075 | 10.682 | 9.142 | 9.131 | 9.464 | 0.2853 |
| CLSPN              | 3.27 | 5.609  | 5.924  | 6.615  | 4.297 | 4.361 | 4.542 | 0.0254 |
| CLDN2              | 3.25 | 7.619  | 7.745  | 8.030  | 6.149 | 6.236 | 5.924 | 0.0005 |
| RRM2               | 3.24 | 11.247 | 11.205 | 11.442 | 9.696 | 9.511 | 9.606 | 0.0001 |
| GINS4              | 3.23 | 7.728  | 7.694  | 7.985  | 6.269 | 5.901 | 6.161 | 0.0003 |
| DTL                | 3.21 | 8.791  | 8.954  | 9.090  | 7.235 | 7.266 | 7.307 | 0.0017 |
| CA12               | 3.20 | 7.196  | 7.154  | 7.211  | 5.444 | 5.319 | 5.728 | 0.0044 |
| UBE2T              | 3.19 | 11.554 | 11.512 | 11.367 | 9.824 | 9.713 | 9.881 | 0.0000 |
| HMMR               | 3.18 | 7.176  | 7.898  | 7.234  | 5.815 | 5.553 | 6.009 | 0.0073 |
| RUNX3              | 7.61 | 7.271  | 5.877  | 5.842  | 5.459 | 3.838 | 3.838 | 7.3107 |
| UCHL5              | 3.17 | 7.119  | 7.596  | 7.655  | 5.940 | 5.580 | 5.882 | 0.0022 |
| CLDN2              | 3.17 | 9.375  | 9.342  | 9.430  | 7.476 | 7.844 | 7.809 | 0.0035 |
| DTL                | 3.15 | 9.050  | 8.940  | 9.420  | 7.433 | 7.460 | 7.593 | 0.0040 |
| MCM4               | 3.14 | 9.230  | 9.005  | 9.692  | 7.808 | 7.445 | 7.784 | 0.0049 |
| PBK                | 3.12 | 8.822  | 9.066  | 9.057  | 7.488 | 7.224 | 7.313 | 0.0001 |
| NEK2               | 3.12 | 8.856  | 9.201  | 8.925  | 7.411 | 7.592 | 7.028 | 0.0022 |
| ERCC6L             | 3.11 | 6.646  | 6.741  | 7.297  | 4.846 | 5.653 | 5.259 | 0.0064 |
| FSBP ///<br>RAD54B | 3.10 | 6.879  | 7.160  | 7.290  | 5.569 | 5.512 | 5.368 | 0.0014 |
| MCM10              | 3.10 | 7.935  | 8.042  | 8.513  | 6.694 | 6.581 | 6.372 | 0.0038 |
| REG4               | 3.08 | 11.369 | 11.295 | 10.963 | 9.519 | 9.478 | 9.779 | 0.0007 |
| KIAA010<br>1       | 3.07 | 7.701  | 7.856  | 7.942  | 6.259 | 5.960 | 6.401 | 0.0014 |
| HPDL               | 3.06 | 8.410  | 8.105  | 8.586  | 6.763 | 6.383 | 7.077 | 0.0039 |
| E2F8               | 3.06 | 7.068  | 7.119  | 7.512  | 5.409 | 5.941 | 5.496 | 0.0019 |
| TYMS               | 3.05 | 9.448  | 9.287  | 9.629  | 7.930 | 7.416 | 8.125 | 0.0072 |
| FABP5              | 3.05 | 9.887  | 9.813  | 10.350 | 8.342 | 8.136 | 8.742 | 0.0028 |
| SLC12A2            | 3.05 | 9.532  | 9.632  | 9.645  | 8.133 | 7.971 | 7.872 | 0.0004 |
| BLM                | 3.04 | 7.296  | 7.854  | 7.727  | 6.257 | 6.140 | 5.651 | 0.0031 |
| LMNB1              | 3.03 | 8.036  | 7.908  | 8.162  | 6.548 | 6.376 | 6.387 | 0.0001 |
| KIAA010<br>1       | 3.02 | 11.318 | 11.337 | 11.289 | 9.702 | 9.488 | 9.936 | 0.0060 |
| RBM45              | 3.00 | 7.733  | 8.004  | 7.870  | 6.299 | 6.631 | 5.813 | 0.0138 |
| GINS1              | 3.00 | 6.371  | 6.127  | 7.158  | 4.907 | 4.915 | 5.262 | 0.0274 |
| MCM2               | 2.95 | 8.988  | 8.720  | 8.978  | 7.452 | 7.053 | 7.472 | 0.0013 |
| CA12               | 2.95 | 7.209  | 7.082  | 7.160  | 5.515 | 5.417 | 5.809 | 0.0030 |
| MIS18BP<br>1       | 2.94 | 6.019  | 6.774  | 6.413  | 4.958 | 4.688 | 4.973 | 0.0103 |
| GINS4              | 2.93 | 5.991  | 6.270  | 6.155  | 4.738 | 4.288 | 4.703 | 0.0021 |
| HELLS              | 2.92 | 8.284  | 8.721  | 8.499  | 7.213 | 6.768 | 6.882 | 0.0011 |
| MCM4               | 2.92 | 9.030  | 8.804  | 9.235  | 7.509 | 7.240 | 7.684 | 0.0010 |

|                |      |        |        |        |        |        |        |        |
|----------------|------|--------|--------|--------|--------|--------|--------|--------|
| CDCA7          | 2.91 | 7.916  | 7.964  | 8.247  | 6.698  | 6.210  | 6.576  | 0.0016 |
| DLEU2          | 2.89 | 7.434  | 7.836  | 8.024  | 6.333  | 6.215  | 6.209  | 0.0099 |
| MCM4           | 2.89 | 9.960  | 9.729  | 10.336 | 8.556  | 8.396  | 8.542  | 0.0091 |
| GINS4          | 2.88 | 5.850  | 6.034  | 6.016  | 4.548  | 4.241  | 4.520  | 0.0006 |
| CDKN2A<br>IPNL | 2.88 | 12.280 | 12.141 | 12.501 | 10.779 | 10.727 | 10.858 | 0.2411 |
| E2F8           | 2.88 | 6.672  | 6.689  | 6.980  | 5.270  | 5.170  | 5.340  | 0.0010 |
| SESTD1         | 2.87 | 6.793  | 6.940  | 7.052  | 5.596  | 5.385  | 5.226  | 0.0006 |
| KIAA010<br>1   | 2.83 | 12.611 | 12.539 | 12.622 | 11.138 | 10.805 | 11.280 | 0.0070 |
| HMMR           | 2.83 | 9.168  | 9.778  | 9.316  | 7.967  | 8.046  | 7.801  | 0.0079 |
| MCM6           | 2.83 | 9.838  | 9.925  | 9.952  | 8.602  | 8.262  | 8.327  | 0.0023 |
| GINS1          | 2.83 | 9.546  | 9.435  | 10.056 | 8.175  | 8.144  | 8.292  | 0.0128 |
| CCNA2          | 2.83 | 9.312  | 9.404  | 9.436  | 7.887  | 7.954  | 7.812  | 0.0000 |
| HELLS          | 2.82 | 6.625  | 7.018  | 6.617  | 5.379  | 5.322  | 5.093  | 0.0014 |
| KIAA119<br>9   | 2.82 | 7.479  | 7.630  | 7.522  | 6.156  | 5.924  | 6.066  | 0.0001 |
| MCM3           | 2.81 | 10.367 | 10.226 | 10.429 | 8.970  | 8.603  | 8.962  | 0.0018 |
| RIBC2          | 2.79 | 7.138  | 6.971  | 7.456  | 5.477  | 5.623  | 6.008  | 0.0023 |
| SLC40A1        | 2.78 | 7.140  | 7.529  | 7.190  | 5.702  | 5.929  | 5.831  | 0.0016 |
| MCM6           | 2.77 | 8.128  | 8.083  | 8.304  | 6.937  | 6.453  | 6.680  | 0.0029 |
| RUNX3          | 2.76 | 9.611  | 9.885  | 9.875  | 8.303  | 8.378  | 8.308  | 9.6111 |
| RMI1           | 2.76 | 8.090  | 8.450  | 8.231  | 6.749  | 6.849  | 6.800  | 0.0031 |
| MKI67          | 2.75 | 6.390  | 6.694  | 6.896  | 5.354  | 5.090  | 5.190  | 0.0031 |
| SMC2           | 2.73 | 6.110  | 7.069  | 6.508  | 5.135  | 5.476  | 4.823  | 0.0176 |
| HAUS7          | 2.72 | 8.057  | 7.914  | 8.232  | 6.574  | 6.438  | 6.841  | 0.0008 |
| RFC3           | 2.72 | 9.480  | 9.497  | 9.606  | 8.016  | 8.099  | 8.144  | 0.0000 |
| MCM4           | 2.71 | 9.835  | 9.584  | 10.027 | 8.392  | 8.142  | 8.595  | 0.0014 |
| MSH2           | 2.70 | 7.758  | 8.254  | 8.130  | 6.732  | 6.788  | 6.326  | 0.0023 |
| HSPH1          | 2.70 | 9.781  | 10.025 | 10.464 | 8.557  | 9.000  | 8.438  | 0.0060 |
| RAB27B         | 2.69 | 5.555  | 5.703  | 5.870  | 3.997  | 4.080  | 4.679  | 0.0113 |
| DNA2           | 2.69 | 6.355  | 6.615  | 6.784  | 5.122  | 5.314  | 5.053  | 0.0015 |
| HSPH1          | 2.69 | 7.619  | 8.065  | 8.709  | 6.825  | 6.993  | 6.453  | 0.0312 |
| TMEM14<br>A    | 2.68 | 11.083 | 10.985 | 11.528 | 9.754  | 9.710  | 9.913  | 0.0075 |
| IL20RA         | 2.68 | 6.935  | 7.261  | 6.968  | 5.560  | 5.817  | 5.532  | 0.0005 |
| NEK2           | 2.67 | 8.770  | 9.094  | 8.708  | 7.489  | 7.654  | 7.169  | 0.0018 |
| CDC25A         | 2.66 | 6.899  | 6.790  | 7.548  | 5.649  | 5.493  | 5.941  | 0.0130 |
| ARHGAP<br>11A  | 2.66 | 6.491  | 6.949  | 6.782  | 5.167  | 5.567  | 5.256  | 0.0015 |
| MKI67          | 2.66 | 8.153  | 8.195  | 8.373  | 6.782  | 6.871  | 6.847  | 0.0007 |
| DNA2           | 2.66 | 6.871  | 7.165  | 7.218  | 5.734  | 5.714  | 5.597  | 0.0023 |
| RFC4           | 2.66 | 10.219 | 10.372 | 10.344 | 9.021  | 8.902  | 8.780  | 0.0002 |
| SLC12A2        | 2.65 | 7.391  | 8.196  | 7.501  | 6.544  | 6.191  | 6.242  | 0.0193 |

|           |      |        |        |        |        |        |        |        |
|-----------|------|--------|--------|--------|--------|--------|--------|--------|
| MCM2      | 2.65 | 8.963  | 8.726  | 8.932  | 7.477  | 7.054  | 7.788  | 0.0135 |
| HSPH1     | 2.64 | 8.731  | 8.963  | 9.554  | 7.759  | 7.984  | 7.360  | 0.0128 |
| UCHL5     | 2.64 | 7.209  | 7.559  | 7.253  | 5.791  | 6.217  | 5.802  | 0.0018 |
| NCAPH     | 2.63 | 9.543  | 9.391  | 9.536  | 8.001  | 8.176  | 8.103  | 0.0000 |
| UCHL5     | 2.63 | 9.066  | 9.532  | 9.224  | 7.928  | 8.056  | 7.661  | 0.0017 |
| SPC24     | 2.63 | 8.795  | 8.782  | 8.895  | 7.441  | 7.017  | 7.743  | 0.0188 |
| FAS       | 2.62 | 6.793  | 7.098  | 7.155  | 5.904  | 5.469  | 5.494  | 0.0018 |
| UCHL5     | 2.61 | 6.810  | 7.038  | 7.142  | 5.767  | 5.616  | 5.457  | 0.0005 |
| TIPIN     | 2.60 | 8.587  | 8.756  | 8.994  | 7.329  | 7.451  | 7.443  | 0.0039 |
| OAS3      | 2.60 | 7.943  | 7.917  | 8.052  | 6.623  | 6.426  | 6.717  | 0.0009 |
| MCM7      | 2.60 | 10.729 | 10.573 | 10.925 | 9.393  | 9.140  | 9.552  | 0.0010 |
| TMX1      | 2.60 | 9.313  | 9.621  | 9.418  | 8.060  | 8.309  | 7.834  | 0.0020 |
| TYMS      | 2.59 | 10.768 | 10.656 | 10.935 | 9.534  | 9.112  | 9.560  | 0.0031 |
| HMMR      | 2.59 | 7.030  | 7.801  | 7.350  | 5.873  | 6.156  | 6.127  | 0.0161 |
| MSH2      | 2.58 | 7.914  | 8.397  | 8.232  | 6.902  | 7.016  | 6.516  | 0.0027 |
| CCNA2     | 2.58 | 9.588  | 9.679  | 9.690  | 8.247  | 8.418  | 8.181  | 0.0006 |
| DEPDC7    | 2.58 | 6.141  | 6.807  | 6.846  | 5.368  | 5.519  | 4.821  | 0.0121 |
| MCM4      | 2.58 | 10.819 | 10.590 | 11.042 | 9.567  | 9.205  | 9.587  | 0.0016 |
| DNMT1     | 2.57 | 8.399  | 8.186  | 8.295  | 7.047  | 6.943  | 6.794  | 0.0002 |
| CHRNA5    | 2.57 | 7.646  | 7.957  | 8.003  | 6.408  | 6.435  | 6.688  | 0.0009 |
| SPAG5     | 2.57 | 9.356  | 9.428  | 9.428  | 8.161  | 7.935  | 8.031  | 0.0008 |
| KIAA0101  | 2.56 | 11.904 | 12.249 | 12.217 | 10.675 | 10.616 | 10.999 | 0.0011 |
| ATAD2     | 2.56 | 8.121  | 8.647  | 8.388  | 7.044  | 7.261  | 6.786  | 0.0028 |
| DUT       | 2.56 | 8.512  | 8.423  | 8.651  | 7.190  | 6.944  | 7.359  | 0.0019 |
| HSP90A A1 | 2.56 | 11.077 | 11.442 | 11.404 | 9.976  | 10.129 | 9.753  | 0.0011 |
| MSH6      | 2.56 | 9.400  | 9.565  | 9.791  | 8.271  | 8.395  | 8.024  | 0.0010 |
| ORC1      | 2.55 | 8.392  | 8.244  | 8.717  | 7.059  | 7.015  | 7.256  | 0.0033 |
| ASPM      | 2.55 | 6.195  | 6.863  | 6.662  | 5.032  | 5.307  | 5.388  | 0.0089 |
| ATAD2     | 2.55 | 9.173  | 9.732  | 9.460  | 8.009  | 8.400  | 7.917  | 0.0036 |
| RAD51A P1 | 2.55 | 8.262  | 8.692  | 8.443  | 7.204  | 6.917  | 7.243  | 0.0013 |
| TMEM201   | 2.54 | 7.534  | 7.082  | 7.766  | 6.022  | 6.076  | 6.308  | 0.0117 |
| HOXA13    | 2.54 | 8.816  | 8.930  | 9.143  | 7.661  | 7.731  | 7.464  | 0.0005 |
| UCHL5     | 2.53 | 8.184  | 8.714  | 8.473  | 7.152  | 7.346  | 6.854  | 0.0031 |
| HSPH1     | 2.53 | 8.370  | 8.678  | 9.294  | 7.324  | 7.768  | 7.342  | 0.0234 |
| WDR67     | 2.53 | 5.835  | 6.320  | 5.803  | 4.770  | 4.637  | 4.586  | 0.0098 |
| GPSM2     | 2.53 | 9.027  | 9.368  | 9.329  | 8.066  | 8.045  | 7.571  | 0.0037 |
| HAT1      | 2.52 | 9.569  | 10.155 | 10.008 | 8.506  | 8.772  | 8.492  | 0.0069 |
| SHCBP1    | 2.52 | 7.645  | 7.902  | 7.997  | 6.666  | 6.550  | 6.323  | 0.0008 |
| KIF23     | 2.52 | 7.627  | 8.355  | 7.991  | 6.853  | 7.012  | 6.018  | 0.0269 |
| NEK2      | 2.52 | 8.375  | 8.679  | 8.287  | 7.198  | 7.301  | 6.833  | 0.0022 |

|              |      |        |        |        |        |        |        |        |
|--------------|------|--------|--------|--------|--------|--------|--------|--------|
| SGK494       | 2.52 | 8.053  | 8.035  | 8.328  | 6.793  | 6.756  | 6.888  | 0.0018 |
| SMC3         | 2.52 | 6.126  | 7.126  | 6.515  | 5.228  | 5.639  | 5.014  | 0.0267 |
| RAD51A<br>P1 | 2.51 | 8.264  | 8.662  | 8.463  | 7.215  | 6.936  | 7.255  | 0.0010 |
| BRI3BP       | 2.51 | 7.806  | 7.758  | 7.905  | 6.565  | 6.205  | 6.674  | 0.0068 |
| PRIM2        | 2.51 | 7.983  | 7.893  | 8.176  | 6.829  | 6.417  | 6.797  | 0.0021 |
| DBF4         | 2.51 | 7.487  | 8.259  | 7.835  | 6.492  | 6.932  | 6.175  | 0.0133 |
| HSPH1        | 2.51 | 8.979  | 9.268  | 9.809  | 7.948  | 8.377  | 7.813  | 0.0150 |
| MAD2L1       | 2.51 | 10.201 | 10.389 | 10.451 | 8.999  | 9.079  | 8.992  | 0.0012 |
| MSH2         | 2.51 | 7.926  | 8.233  | 8.009  | 6.596  | 7.055  | 6.496  | 0.0060 |
| HAUS7        | 2.51 | 8.386  | 8.248  | 8.644  | 7.129  | 6.848  | 7.316  | 0.0019 |
| TUBB         | 2.50 | 11.817 | 11.618 | 12.017 | 10.400 | 10.527 | 10.576 | 0.0025 |
| MAD2L1       | 2.50 | 9.710  | 9.889  | 9.981  | 8.517  | 8.460  | 8.646  | 0.0003 |
| BMP4         | 2.49 | 11.504 | 11.364 | 11.761 | 10.207 | 10.252 | 10.251 | 0.0070 |
| NUSAP1       | 2.49 | 9.651  | 9.805  | 9.797  | 8.416  | 8.488  | 8.411  | 0.0002 |
| HAUS7        | 2.49 | 8.795  | 8.717  | 8.949  | 7.583  | 7.217  | 7.687  | 0.0042 |
| SMC3         | 2.49 | 7.601  | 8.451  | 7.843  | 6.515  | 6.986  | 6.540  | 0.0186 |
| MORC4        | 2.48 | 10.310 | 10.540 | 10.415 | 9.129  | 9.185  | 9.019  | 0.0002 |
| FAM83D       | 2.48 | 9.784  | 9.667  | 10.241 | 8.722  | 8.530  | 8.567  | 0.0113 |
| CDKN2A       | 2.48 | 8.324  | 9.222  | 8.494  | 7.465  | 7.794  | 6.873  | 0.0447 |
| SLC12A2      | 2.48 | 9.693  | 10.284 | 9.779  | 8.649  | 8.857  | 8.351  | 0.0061 |
| HAT1         | 2.47 | 9.470  | 10.070 | 9.837  | 8.459  | 8.644  | 8.404  | 0.0092 |
| RMI1         | 2.47 | 6.703  | 6.909  | 7.130  | 5.975  | 5.461  | 5.340  | 0.0075 |
| IL20RA       | 2.47 | 7.273  | 7.335  | 7.291  | 5.872  | 6.032  | 6.072  | 0.0010 |
| SPRR3        | 2.47 | 6.420  | 6.055  | 6.405  | 4.945  | 4.856  | 5.177  | 0.0013 |
| NEK2         | 2.47 | 8.972  | 9.406  | 8.994  | 7.844  | 7.923  | 7.731  | 0.0057 |
| HMGN3        | 2.47 | 7.588  | 7.838  | 7.836  | 6.678  | 6.397  | 6.261  | 0.0016 |
| CEP55        | 2.45 | 8.371  | 8.713  | 8.576  | 7.319  | 7.534  | 6.882  | 0.0090 |
| TMEM48       | 2.44 | 9.863  | 10.079 | 9.994  | 8.715  | 8.776  | 8.581  | 0.0001 |
| SASS6        | 2.43 | 6.485  | 7.223  | 6.760  | 5.431  | 5.862  | 5.369  | 0.0111 |
| SPRR1A       | 2.43 | 7.347  | 7.101  | 7.371  | 6.001  | 5.964  | 6.023  | 0.0034 |
| MLF1IP       | 2.42 | 6.760  | 7.043  | 6.565  | 5.757  | 5.354  | 5.435  | 0.0025 |
| BRIX1        | 2.42 | 10.246 | 10.534 | 10.509 | 9.099  | 9.408  | 8.933  | 0.0027 |
| OPA1         | 2.42 | 6.929  | 7.575  | 7.082  | 6.025  | 5.780  | 6.023  | 0.0131 |
| ZNF367       | 2.42 | 6.656  | 6.724  | 7.482  | 5.948  | 5.834  | 5.346  | 0.0224 |
| ZWILCH       | 2.42 | 8.118  | 8.659  | 8.458  | 7.261  | 7.151  | 7.050  | 0.0083 |
| LRP8         | 2.41 | 9.719  | 9.534  | 9.804  | 8.360  | 8.225  | 8.639  | 0.0018 |
| MCM2         | 2.41 | 9.938  | 9.652  | 9.772  | 8.525  | 8.261  | 8.737  | 0.0030 |
| BUB1B        | 2.41 | 9.257  | 9.331  | 9.638  | 8.185  | 8.317  | 7.910  | 0.0016 |
| NIN          | 2.41 | 7.377  | 7.991  | 7.560  | 6.238  | 6.686  | 6.215  | 0.0066 |
| CDKN2A<br>IP | 2.41 | 7.201  | 7.099  | 6.805  | 5.560  | 5.892  | 5.853  | 0.6973 |
| NEK2         | 2.40 | 8.354  | 8.712  | 8.423  | 7.066  | 7.555  | 7.047  | 0.0050 |
| RMI1         | 2.40 | 5.760  | 6.506  | 6.318  | 5.346  | 4.836  | 4.623  | 0.0154 |



|                |      |        |        |        |        |        |        |        |
|----------------|------|--------|--------|--------|--------|--------|--------|--------|
| MCM8           | 2.39 | 7.235  | 7.778  | 7.708  | 6.504  | 6.374  | 6.094  | 0.0054 |
| TGFBR3         | 2.39 | 6.992  | 6.852  | 7.227  | 5.701  | 5.867  | 5.756  | 0.0026 |
| ZNF615         | 2.38 | 4.805  | 5.681  | 4.884  | 3.855  | 3.873  | 4.043  | 0.0449 |
| SERPIND<br>1   | 2.38 | 6.803  | 6.723  | 6.762  | 5.578  | 5.353  | 5.591  | 0.0020 |
| SLC35G1        | 2.38 | 7.576  | 7.707  | 8.301  | 6.818  | 6.649  | 6.456  | 0.0180 |
| SKP2           | 2.38 | 6.615  | 6.663  | 6.895  | 5.606  | 5.335  | 5.491  | 0.0005 |
| MORC4          | 2.37 | 9.904  | 10.192 | 9.964  | 8.941  | 8.826  | 8.538  | 0.0016 |
| TOPBP1         | 2.37 | 8.081  | 8.562  | 8.416  | 7.062  | 7.370  | 6.893  | 0.0034 |
| DLEU2          | 2.37 | 7.004  | 7.584  | 7.687  | 6.411  | 5.948  | 6.236  | 0.0124 |
| OAS1           | 2.37 | 8.510  | 8.609  | 8.433  | 7.369  | 7.110  | 7.333  | 0.0005 |
| CEP55          | 2.36 | 8.820  | 9.239  | 9.161  | 7.707  | 8.196  | 7.547  | 0.0087 |
| MKI67          | 2.36 | 8.329  | 8.718  | 8.486  | 7.394  | 7.433  | 6.965  | 0.0034 |
| PDE3B          | 2.36 | 7.335  | 7.218  | 7.730  | 6.167  | 6.495  | 5.885  | 0.0063 |
| ZNF614         | 2.36 | 7.705  | 8.119  | 7.977  | 6.574  | 6.878  | 6.639  | 0.0017 |
| CDCA2          | 2.36 | 5.501  | 5.641  | 5.799  | 4.474  | 4.435  | 4.327  | 0.0011 |
| SFXN1          | 2.36 | 9.733  | 9.697  | 9.999  | 8.595  | 8.575  | 8.562  | 0.0056 |
| SHCBP1         | 2.36 | 7.170  | 7.255  | 7.589  | 6.226  | 6.294  | 5.763  | 0.0050 |
| CYP1B1         | 2.36 | 7.535  | 8.013  | 7.608  | 6.879  | 6.056  | 6.441  | 0.0161 |
| CDKN2A<br>IPNL | 2.36 | 10.219 | 9.865  | 10.275 | 8.976  | 8.503  | 9.132  | 0.0821 |
| HSPH1          | 2.36 | 9.961  | 10.284 | 10.687 | 9.034  | 9.386  | 8.842  | 0.0115 |
| KIAA152<br>4   | 2.35 | 5.038  | 5.838  | 5.526  | 4.334  | 4.545  | 3.842  | 0.0176 |
| ZWILCH         | 2.35 | 7.873  | 8.190  | 8.061  | 6.784  | 6.943  | 6.701  | 0.0006 |
| MORC4          | 2.35 | 9.864  | 10.083 | 9.883  | 8.778  | 8.757  | 8.597  | 0.0002 |
| UHRF1          | 2.35 | 8.585  | 8.303  | 8.851  | 7.342  | 7.247  | 7.492  | 0.0076 |
| SLBP           | 2.35 | 9.450  | 9.327  | 9.854  | 8.424  | 8.368  | 8.186  | 0.0077 |
| GCFC1          | 2.35 | 6.463  | 7.007  | 7.148  | 5.516  | 5.861  | 5.611  | 0.0148 |
| KNTC1          | 2.35 | 6.777  | 7.446  | 7.072  | 5.978  | 5.938  | 5.755  | 0.0161 |
| MORC4          | 2.35 | 10.555 | 10.868 | 10.779 | 9.509  | 9.517  | 9.502  | 0.0057 |
| SSX2IP         | 2.35 | 6.626  | 7.151  | 6.935  | 5.647  | 5.843  | 5.563  | 0.0054 |
| UCHL5          | 2.35 | 7.031  | 7.368  | 7.253  | 6.127  | 6.081  | 5.744  | 0.0016 |
| MELK           | 2.34 | 8.428  | 8.601  | 8.406  | 7.362  | 7.321  | 7.058  | 0.0009 |
| CKAP2          | 2.34 | 7.047  | 7.942  | 7.700  | 6.333  | 6.711  | 6.033  | 0.0256 |
| ZWINT          | 2.34 | 9.113  | 9.162  | 9.164  | 8.014  | 7.668  | 8.055  | 0.0088 |
| HSPA8 D        | 2.33 | 5.448  | 5.580  | 5.920  | 4.547  | 4.606  | 4.124  | 0.0042 |
| HSP90A<br>A4P  | 2.33 | 11.241 | 11.689 | 11.534 | 10.198 | 10.579 | 9.996  | 0.0056 |
| SFXN1          | 2.33 | 8.782  | 8.737  | 8.714  | 7.475  | 7.671  | 7.410  | 0.0026 |
| ZWINT          | 2.33 | 11.914 | 11.866 | 12.134 | 10.934 | 10.420 | 10.862 | 0.0065 |
| MIS18BP<br>1   | 2.33 | 4.748  | 5.535  | 5.306  | 4.085  | 3.733  | 4.187  | 0.0185 |
| CDC25A         | 2.33 | 8.331  | 7.963  | 8.931  | 7.267  | 7.031  | 7.415  | 0.0392 |

|              |      |        |        |        |        |        |        |        |
|--------------|------|--------|--------|--------|--------|--------|--------|--------|
| MCM7         | 2.33 | 10.905 | 10.837 | 10.972 | 9.648  | 9.430  | 9.941  | 0.0102 |
| TOP2A        | 2.33 | 9.480  | 10.089 | 9.720  | 8.706  | 8.784  | 8.130  | 0.0114 |
| SPRR1A       | 2.32 | 5.978  | 5.575  | 5.936  | 4.966  | 4.625  | 4.177  | 0.0161 |
| CNN3         | 2.32 | 9.712  | 9.827  | 9.829  | 8.635  | 8.637  | 8.445  | 0.0003 |
| CCNB1        | 2.32 | 11.951 | 11.933 | 11.989 | 10.731 | 10.789 | 10.707 | 0.0000 |
| FAS          | 2.32 | 7.174  | 7.442  | 7.411  | 6.384  | 6.181  | 5.767  | 0.0103 |
| UHRF1        | 2.32 | 10.280 | 9.930  | 10.573 | 9.226  | 8.820  | 9.137  | 0.0086 |
| MIR17H<br>G  | 2.32 | 5.739  | 6.210  | 6.116  | 4.940  | 5.068  | 4.364  | 0.0127 |
| NEK2         | 2.32 | 9.912  | 10.311 | 9.970  | 8.862  | 9.092  | 8.591  | 0.0034 |
| TOP2A        | 2.32 | 8.889  | 9.471  | 9.044  | 8.064  | 8.028  | 7.718  | 0.0072 |
| BARD1        | 2.31 | 8.199  | 8.385  | 8.199  | 7.108  | 7.256  | 6.751  | 0.0072 |
| MCM3         | 2.31 | 10.551 | 10.209 | 10.509 | 9.306  | 8.934  | 9.383  | 0.0029 |
| DBF4         | 2.31 | 6.944  | 7.528  | 7.218  | 6.053  | 6.168  | 5.887  | 0.0088 |
| TFRC         | 2.31 | 8.883  | 9.263  | 9.163  | 7.958  | 8.128  | 7.568  | 0.0055 |
| SLBP         | 2.31 | 10.256 | 10.124 | 10.703 | 9.122  | 9.341  | 9.046  | 0.0093 |
| CYP1B1       | 2.31 | 8.734  | 9.240  | 8.876  | 7.860  | 7.473  | 7.905  | 0.0042 |
| RFC3         | 2.31 | 10.197 | 10.345 | 10.320 | 9.075  | 9.146  | 9.024  | 0.0001 |
| MCM3         | 2.31 | 11.156 | 10.972 | 11.241 | 10.106 | 9.561  | 10.042 | 0.0091 |
| CENPF        | 2.30 | 6.982  | 7.636  | 7.202  | 5.967  | 6.324  | 5.964  | 0.0102 |
| MSH6         | 2.30 | 7.817  | 8.102  | 8.381  | 6.963  | 7.060  | 6.695  | 0.0056 |
| TBC1D4       | 2.30 | 8.566  | 8.665  | 8.907  | 7.687  | 7.673  | 7.119  | 0.0098 |
| HMMR         | 2.30 | 7.652  | 8.277  | 7.804  | 6.709  | 6.779  | 6.712  | 0.0233 |
| METTL7<br>B  | 2.30 | 8.746  | 8.560  | 8.795  | 7.315  | 7.389  | 7.760  | 0.0043 |
| MRPL17       | 2.30 | 11.628 | 11.536 | 11.652 | 10.423 | 10.270 | 10.508 | 0.0006 |
| MORC4        | 2.30 | 10.856 | 11.097 | 11.042 | 9.928  | 9.880  | 9.572  | 0.0016 |
| DBF4         | 2.30 | 7.617  | 8.260  | 8.043  | 6.578  | 7.286  | 6.357  | 0.0273 |
| EXO1         | 2.30 | 7.586  | 7.694  | 7.735  | 6.400  | 6.486  | 6.531  | 0.0000 |
| MCM8         | 2.30 | 6.938  | 7.352  | 7.278  | 6.205  | 6.177  | 5.525  | 0.0153 |
| UNG          | 2.30 | 10.342 | 10.074 | 10.550 | 9.267  | 8.754  | 9.322  | 0.0073 |
| ANLN         | 2.29 | 9.511  | 10.020 | 10.041 | 8.529  | 9.007  | 8.435  | 0.0084 |
| SMARCE<br>1  | 2.29 | 8.165  | 8.494  | 8.323  | 7.028  | 7.321  | 7.050  | 0.0009 |
| SPC24        | 2.29 | 7.610  | 7.609  | 7.902  | 6.730  | 6.373  | 6.432  | 0.0014 |
| HSP90A<br>A1 | 2.28 | 8.033  | 8.454  | 8.359  | 7.005  | 7.275  | 7.010  | 0.0025 |
| BUB1         | 2.28 | 8.762  | 8.938  | 9.071  | 7.769  | 7.884  | 7.546  | 0.0009 |
| CD47         | 2.28 | 6.985  | 6.973  | 7.274  | 6.056  | 5.960  | 5.641  | 0.0021 |
| OAS3         | 2.28 | 9.556  | 9.413  | 9.537  | 8.436  | 7.991  | 8.474  | 0.0113 |
| DBF4         | 2.28 | 6.591  | 7.257  | 7.041  | 5.606  | 6.271  | 5.372  | 0.0256 |
| CDH1         | 2.28 | 7.489  | 8.156  | 7.566  | 6.595  | 6.829  | 6.270  | 0.3025 |
| MAD2L1       | 2.28 | 10.703 | 10.836 | 10.875 | 9.559  | 9.702  | 9.596  | 0.0001 |
| CENPH        | 2.28 | 9.556  | 9.588  | 9.566  | 8.411  | 8.241  | 8.488  | 0.0033 |

|           |      |        |        |        |       |        |       |        |
|-----------|------|--------|--------|--------|-------|--------|-------|--------|
| NUDT6     | 2.28 | 6.239  | 6.363  | 6.589  | 5.454 | 4.960  | 5.199 | 0.0035 |
| TOP2A     | 2.27 | 9.407  | 9.991  | 9.459  | 8.477 | 8.570  | 8.319 | 0.0150 |
| BRI3BP    | 2.27 | 8.067  | 7.912  | 8.471  | 7.049 | 6.570  | 7.264 | 0.0119 |
| BRI3BP    | 2.27 | 9.129  | 9.029  | 9.314  | 8.055 | 7.774  | 8.097 | 0.0010 |
| TUBGCP5   | 2.26 | 6.424  | 6.483  | 6.332  | 5.451 | 5.224  | 4.995 | 0.0070 |
| HMG3      | 2.26 | 10.086 | 10.190 | 10.312 | 9.068 | 9.052  | 8.939 | 0.0003 |
| DEPDC7    | 2.26 | 6.148  | 6.509  | 6.871  | 5.247 | 5.659  | 5.121 | 0.0132 |
| CDCA3     | 2.26 | 8.668  | 8.748  | 9.038  | 7.602 | 7.480  | 7.841 | 0.0016 |
| SMC4      | 2.26 | 7.362  | 8.265  | 7.560  | 6.748 | 6.788  | 6.228 | 0.0320 |
| PCYOX1    | 2.25 | 7.998  | 7.935  | 8.200  | 7.052 | 6.910  | 6.634 | 0.0024 |
| SMC3      | 2.25 | 6.568  | 7.462  | 6.682  | 5.773 | 6.115  | 5.392 | 0.0346 |
| HSPH1     | 2.25 | 10.043 | 10.211 | 10.733 | 9.114 | 9.487  | 8.905 | 0.0135 |
| CKAP2     | 2.25 | 8.288  | 8.904  | 8.766  | 7.434 | 7.799  | 7.229 | 0.0099 |
| PARP9     | 2.25 | 6.949  | 7.002  | 7.061  | 6.152 | 5.866  | 5.390 | 0.0304 |
| CDKN3     | 2.25 | 7.832  | 7.993  | 8.259  | 6.815 | 6.838  | 6.957 | 0.0062 |
| RAPGEF5   | 2.25 | 7.453  | 7.589  | 7.379  | 6.222 | 6.715  | 5.863 | 0.0330 |
| MIS18A    | 2.25 | 8.187  | 8.156  | 8.396  | 7.169 | 7.082  | 6.994 | 0.0005 |
| REG4      | 2.24 | 5.826  | 5.047  | 5.512  | 4.311 | 4.516  | 4.142 | 0.0221 |
| WDR76     | 2.24 | 7.744  | 7.495  | 7.863  | 6.792 | 6.240  | 6.549 | 0.0056 |
| TTK       | 2.24 | 7.864  | 8.457  | 8.111  | 6.905 | 7.235  | 6.838 | 0.0074 |
| BRX1      | 2.24 | 10.736 | 11.019 | 10.910 | 9.709 | 10.027 | 9.393 | 0.0121 |
| CKAP2     | 2.23 | 8.319  | 8.766  | 8.734  | 7.410 | 7.740  | 7.179 | 0.0061 |
| C2orf18   | 2.23 | 10.448 | 10.421 | 10.503 | 9.364 | 9.207  | 9.325 | 0.0002 |
| FAM217B   | 2.23 | 6.640  | 6.890  | 7.325  | 5.717 | 6.127  | 5.571 | 0.0126 |
| C15orf23  | 2.23 | 10.200 | 10.304 | 10.224 | 9.016 | 9.295  | 8.930 | 0.0056 |
| KIF23     | 2.23 | 8.189  | 8.873  | 8.628  | 7.484 | 7.665  | 7.102 | 0.0126 |
| SEPT11    | 2.23 | 8.405  | 8.726  | 8.666  | 7.578 | 7.488  | 7.270 | 0.0010 |
| SEPT11    | 2.23 | 7.342  | 7.534  | 7.381  | 6.086 | 6.550  | 6.117 | 0.0086 |
| C3orf58   | 2.23 | 5.990  | 6.238  | 6.500  | 5.262 | 5.283  | 4.691 | 0.0104 |
| FEN1      | 2.22 | 10.375 | 10.012 | 10.660 | 9.176 | 9.242  | 9.243 | 0.0252 |
| DIXDC1    | 2.22 | 4.510  | 4.434  | 5.157  | 3.736 | 3.654  | 3.340 | 0.0222 |
| KLHL23    | 2.22 | 8.244  | 8.361  | 8.746  | 7.288 | 7.235  | 7.416 | 0.0104 |
| GLMN      | 2.22 | 6.774  | 7.109  | 7.079  | 5.756 | 5.936  | 5.838 | 0.0028 |
| RAD51A P1 | 2.22 | 8.056  | 8.452  | 8.283  | 7.203 | 6.889  | 7.250 | 0.0021 |
| CKAP2     | 2.22 | 6.723  | 7.349  | 7.026  | 5.875 | 6.190  | 5.597 | 0.0101 |
| SGOL2     | 2.22 | 4.396  | 5.208  | 5.083  | 3.599 | 3.926  | 3.825 | 0.0347 |
| DBF4      | 2.21 | 7.560  | 8.141  | 7.746  | 6.682 | 6.908  | 6.442 | 0.0074 |
| VRK1      | 2.21 | 7.130  | 7.784  | 7.462  | 6.222 | 6.379  | 6.402 | 0.0199 |
| DEPDC1B   | 2.21 | 9.313  | 9.584  | 9.455  | 8.254 | 8.390  | 8.280 | 0.0009 |

|           |      |        |        |        |        |        |        |        |
|-----------|------|--------|--------|--------|--------|--------|--------|--------|
| ASF1B     | 2.21 | 8.607  | 8.466  | 8.844  | 7.563  | 6.983  | 7.838  | 0.0280 |
| KIF11     | 2.21 | 8.434  | 8.802  | 8.847  | 7.585  | 7.662  | 7.434  | 0.0047 |
| TIPIN     | 2.21 | 8.325  | 8.252  | 8.484  | 7.234  | 7.362  | 7.028  | 0.0011 |
| SEMA3A    | 2.21 | 7.048  | 7.663  | 7.135  | 6.332  | 6.216  | 5.921  | 0.0118 |
| KRR1      | 2.21 | 7.657  | 8.544  | 7.906  | 6.971  | 7.046  | 6.806  | 0.0455 |
| PMS1      | 2.20 | 6.628  | 7.310  | 7.044  | 5.825  | 6.101  | 5.682  | 0.0133 |
| HMGCR     | 2.20 | 8.177  | 8.462  | 8.235  | 7.100  | 7.366  | 6.974  | 0.0019 |
| HSPA4L    | 2.20 | 7.282  | 7.851  | 7.835  | 6.555  | 6.819  | 6.172  | 0.0126 |
| GEMIN5    | 2.20 | 9.048  | 9.029  | 9.543  | 8.163  | 8.083  | 8.014  | 0.0170 |
| HMGCR     | 2.20 | 8.583  | 8.799  | 8.447  | 7.304  | 7.857  | 7.183  | 0.0162 |
| HNMT      | 2.20 | 5.045  | 5.538  | 4.751  | 4.000  | 4.063  | 3.972  | 0.0393 |
| KIAA1586  | 2.20 | 5.471  | 6.254  | 6.228  | 4.842  | 4.953  | 4.876  | 0.0489 |
| TMPO      | 2.20 | 7.789  | 7.997  | 8.135  | 6.921  | 6.823  | 6.791  | 0.0035 |
| ANLN      | 2.20 | 7.981  | 8.521  | 8.526  | 7.007  | 7.538  | 7.087  | 0.0101 |
| FANCI     | 2.19 | 8.657  | 8.918  | 8.795  | 7.832  | 7.766  | 7.340  | 0.0077 |
| HAUS7     | 2.19 | 8.469  | 8.355  | 8.660  | 7.487  | 7.213  | 7.393  | 0.0007 |
| MCM7      | 2.19 | 12.626 | 12.394 | 12.629 | 11.481 | 11.243 | 11.529 | 0.0007 |
| GCA       | 2.19 | 7.436  | 7.924  | 7.466  | 6.398  | 6.696  | 6.370  | 0.0063 |
| KBTD6     | 2.19 | 6.275  | 6.717  | 6.601  | 5.306  | 5.580  | 5.337  | 0.0036 |
| CENPQ     | 2.18 | 6.777  | 7.246  | 7.025  | 5.476  | 6.395  | 5.662  | 0.0352 |
| NUSAP1    | 2.18 | 8.934  | 8.979  | 8.945  | 7.870  | 7.929  | 7.675  | 0.0037 |
| MIS18BP1  | 2.18 | 4.507  | 5.315  | 4.932  | 3.799  | 3.940  | 3.748  | 0.0365 |
| LRP8      | 2.18 | 8.822  | 8.366  | 8.668  | 7.430  | 7.271  | 7.772  | 0.0050 |
| NPNT      | 2.18 | 8.163  | 8.344  | 8.224  | 7.220  | 7.146  | 6.990  | 0.0003 |
| C2orf18   | 2.18 | 10.090 | 10.237 | 10.091 | 9.110  | 9.020  | 8.920  | 0.0001 |
| NUDT6     | 2.18 | 6.503  | 6.503  | 6.824  | 5.807  | 5.182  | 5.430  | 0.0103 |
| NUSAP1    | 2.18 | 9.406  | 9.630  | 9.559  | 8.454  | 8.427  | 8.356  | 0.0009 |
| ZNF30     | 2.18 | 5.306  | 5.887  | 5.323  | 4.381  | 4.665  | 4.135  | 0.0116 |
| SMC4      | 2.17 | 7.697  | 8.341  | 8.165  | 7.102  | 7.052  | 6.736  | 0.0131 |
| MCM8      | 2.17 | 6.193  | 6.739  | 6.532  | 5.662  | 5.311  | 5.131  | 0.0073 |
| LOC728802 | 2.17 | 5.662  | 5.922  | 5.783  | 4.897  | 4.469  | 4.626  | 0.0033 |
| LEO1      | 2.17 | 6.824  | 7.472  | 6.843  | 5.990  | 5.955  | 5.940  | 0.0359 |
| EED       | 2.17 | 9.148  | 9.552  | 9.419  | 8.279  | 8.293  | 8.221  | 0.0094 |
| HSPH1     | 2.17 | 10.037 | 10.183 | 10.641 | 9.195  | 9.453  | 8.875  | 0.0110 |
| C9orf100  | 2.17 | 8.106  | 8.091  | 7.947  | 7.146  | 6.437  | 7.112  | 0.0330 |
| CDCA2     | 2.17 | 7.854  | 8.143  | 8.166  | 6.997  | 7.156  | 6.634  | 0.0059 |
| MCM7      | 2.17 | 12.139 | 11.945 | 12.136 | 10.985 | 10.710 | 11.152 | 0.0047 |
| ATG4C     | 2.17 | 5.861  | 6.357  | 5.843  | 5.207  | 4.863  | 4.652  | 0.0089 |
| OSR2      | 2.16 | 6.150  | 6.033  | 6.005  | 4.510  | 5.117  | 5.139  | 0.0266 |
| LOC28554  | 2.16 | 6.172  | 6.928  | 6.452  | 5.027  | 5.559  | 5.652  | 0.0205 |

|              |      |        |        |        |        |        |        |        |
|--------------|------|--------|--------|--------|--------|--------|--------|--------|
| FAM98B       | 2.16 | 9.159  | 9.506  | 9.470  | 8.393  | 8.365  | 8.034  | 0.0022 |
| BCCIP        | 2.16 | 6.663  | 6.910  | 7.130  | 5.615  | 6.230  | 5.431  | 0.0237 |
| KRR1         | 2.16 | 7.343  | 8.016  | 7.616  | 6.634  | 6.878  | 6.096  | 0.0217 |
| SYNCRIP      | 2.16 | 9.403  | 9.672  | 9.688  | 8.377  | 8.693  | 8.347  | 0.0017 |
| FEN1         | 2.16 | 11.143 | 10.958 | 11.533 | 10.258 | 10.072 | 10.017 | 0.0126 |
| C1orf112     | 2.16 | 7.906  | 7.914  | 8.143  | 6.921  | 6.903  | 6.814  | 0.0016 |
| SNRNP25      | 2.16 | 10.505 | 10.442 | 10.685 | 9.510  | 9.106  | 9.642  | 0.0098 |
| LOC100652751 | 2.16 | 8.785  | 8.862  | 8.489  | 7.617  | 7.480  | 7.726  | 0.0025 |
| CKAP2        | 2.16 | 7.866  | 8.307  | 8.135  | 6.938  | 7.292  | 6.726  | 0.0070 |
| C11orf82     | 2.16 | 7.519  | 7.655  | 7.774  | 6.550  | 6.647  | 6.429  | 0.0004 |
| FANCL        | 2.15 | 7.773  | 8.147  | 7.938  | 6.852  | 6.755  | 6.955  | 0.0028 |
| KIF14        | 2.15 | 5.581  | 6.200  | 5.969  | 5.091  | 4.613  | 4.757  | 0.0101 |
| VSNL1        | 2.15 | 5.957  | 6.191  | 6.365  | 5.089  | 4.961  | 5.172  | 0.0037 |
| BRCC3        | 2.15 | 6.163  | 6.506  | 6.465  | 5.254  | 5.501  | 5.062  | 0.0029 |
| SLC40A1      | 2.15 | 7.518  | 7.897  | 7.455  | 6.350  | 6.776  | 6.444  | 0.0044 |
| BRIX1        | 2.14 | 8.519  | 8.780  | 8.762  | 7.441  | 7.891  | 7.386  | 0.0084 |
| ACN9         | 2.14 | 7.952  | 8.024  | 7.845  | 6.966  | 6.724  | 6.826  | 0.0004 |
| ANLN         | 2.14 | 8.852  | 9.504  | 9.442  | 8.061  | 8.545  | 7.903  | 0.0182 |
| CDC7         | 2.14 | 4.349  | 4.799  | 4.555  | 3.548  | 3.561  | 3.325  | 0.0042 |
| HSP90AA4P    | 2.14 | 9.311  | 9.768  | 9.505  | 8.279  | 8.756  | 8.237  | 0.0075 |
| TMEM48       | 2.14 | 9.516  | 9.755  | 9.723  | 8.520  | 8.646  | 8.548  | 0.0010 |
| BCAS2        | 2.13 | 8.986  | 9.468  | 9.067  | 8.097  | 8.370  | 7.755  | 0.0098 |
| C2orf18      | 2.13 | 10.330 | 10.477 | 10.353 | 9.324  | 9.315  | 9.243  | 0.0002 |
| TRIM34       | 2.13 | 7.334  | 7.343  | 7.532  | 6.379  | 6.201  | 6.355  | 0.0002 |
| RECQL        | 2.13 | 7.882  | 8.706  | 8.181  | 7.138  | 7.548  | 6.848  | 0.0279 |
| CENPK        | 2.13 | 8.346  | 8.706  | 8.647  | 7.472  | 7.288  | 7.670  | 0.0022 |
| ZWILCH       | 2.13 | 7.788  | 8.083  | 8.078  | 6.812  | 6.969  | 6.915  | 0.0026 |
| SMC2         | 2.13 | 7.304  | 7.974  | 7.505  | 6.413  | 6.773  | 6.382  | 0.0152 |
| MIS18A       | 2.12 | 7.950  | 8.079  | 8.143  | 6.931  | 7.044  | 6.942  | 0.0003 |
| CROT         | 2.12 | 5.014  | 5.521  | 5.556  | 4.131  | 4.408  | 4.344  | 0.0132 |
| FANCI        | 2.12 | 7.774  | 7.796  | 7.868  | 6.733  | 6.827  | 6.618  | 0.0007 |
| PDE3B        | 2.12 | 6.305  | 6.530  | 7.022  | 5.581  | 5.369  | 5.729  | 0.0218 |
| TMPO         | 2.12 | 6.872  | 6.763  | 7.319  | 6.094  | 5.871  | 5.785  | 0.0109 |
| TUBB         | 2.12 | 12.259 | 12.120 | 12.492 | 11.068 | 11.264 | 11.305 | 0.0021 |
| SYNCRIP      | 2.12 | 7.607  | 7.908  | 7.656  | 6.797  | 6.780  | 6.316  | 0.0075 |
| MAP3K5       | 2.12 | 6.264  | 6.604  | 6.351  | 5.119  | 5.658  | 5.155  | 0.0100 |
| HPSE         | 2.11 | 6.788  | 6.622  | 6.944  | 5.605  | 5.706  | 5.812  | 0.0013 |
| FEN1         | 2.11 | 11.016 | 10.762 | 11.338 | 9.927  | 9.972  | 10.032 | 0.0209 |
| SPC24        | 2.11 | 7.452  | 7.014  | 7.330  | 6.332  | 5.644  | 6.484  | 0.0320 |

|                |      |        |        |        |        |        |        |        |
|----------------|------|--------|--------|--------|--------|--------|--------|--------|
| SGK1           | 2.11 | 8.225  | 8.148  | 8.503  | 7.258  | 7.151  | 7.250  | 0.0059 |
| ANKRD3<br>2    | 2.11 | 6.647  | 7.265  | 7.180  | 6.002  | 5.950  | 5.975  | 0.0314 |
| XRCC4          | 2.11 | 5.605  | 6.291  | 6.049  | 4.948  | 4.828  | 5.007  | 0.0280 |
| SLC5A3         | 2.11 | 7.609  | 8.301  | 8.146  | 7.028  | 7.065  | 6.803  | 0.0252 |
| FAM64A         | 2.11 | 9.801  | 9.627  | 9.890  | 8.715  | 8.493  | 8.867  | 0.0019 |
| CDKN2C         | 2.11 | 7.620  | 7.584  | 7.729  | 6.588  | 6.306  | 6.776  | 0.0099 |
| C9orf41        | 2.11 | 7.182  | 7.507  | 7.815  | 6.242  | 6.712  | 6.348  | 0.0115 |
| ERVMER<br>34-1 | 2.10 | 7.460  | 7.268  | 7.998  | 6.618  | 6.627  | 6.345  | 0.0270 |
| IFI30          | 2.10 | 9.952  | 9.924  | 10.115 | 8.861  | 8.717  | 9.163  | 0.0063 |
| NASP           | 2.10 | 11.678 | 11.671 | 11.842 | 10.751 | 10.717 | 10.501 | 0.0006 |
| MMS22L         | 2.10 | 6.690  | 7.078  | 6.898  | 6.000  | 5.819  | 5.635  | 0.0023 |
| HMGCR          | 2.10 | 9.196  | 9.415  | 9.102  | 8.167  | 8.409  | 7.897  | 0.0061 |
| CSE1L          | 2.10 | 11.200 | 11.583 | 11.370 | 10.413 | 10.459 | 10.063 | 0.0032 |
| TMPO           | 2.10 | 9.600  | 9.729  | 9.820  | 8.765  | 8.512  | 8.658  | 0.0004 |
| LTV1           | 2.10 | 6.465  | 6.902  | 6.893  | 5.792  | 5.817  | 5.456  | 0.0052 |
| UBR7           | 2.10 | 7.831  | 7.861  | 8.026  | 6.813  | 6.703  | 6.989  | 0.0008 |
| CYP1B1         | 2.10 | 8.735  | 9.143  | 8.892  | 7.987  | 7.741  | 7.854  | 0.0034 |
| SCD            | 2.10 | 9.130  | 9.105  | 8.923  | 7.960  | 7.770  | 8.199  | 0.0045 |
| SF3A3          | 2.10 | 9.919  | 9.876  | 9.972  | 8.834  | 8.871  | 8.861  | 0.0001 |
| SETMAR         | 2.09 | 6.254  | 6.427  | 6.486  | 5.353  | 5.610  | 4.935  | 0.0213 |
| CHEK1          | 2.09 | 9.194  | 9.399  | 9.318  | 8.294  | 8.350  | 8.058  | 0.0011 |
| CACYBP         | 2.09 | 9.109  | 9.088  | 9.380  | 8.099  | 8.158  | 8.143  | 0.0063 |
| RPAP3          | 2.09 | 7.075  | 7.648  | 7.233  | 6.323  | 6.403  | 6.079  | 0.0111 |
| PCDHB1<br>6    | 2.09 | 5.837  | 6.066  | 6.154  | 5.274  | 4.644  | 4.895  | 0.0135 |
| TMEM48         | 2.09 | 9.979  | 10.218 | 10.292 | 9.040  | 9.170  | 9.103  | 0.0034 |
| WDR67          | 2.09 | 6.721  | 7.152  | 6.797  | 5.920  | 5.915  | 5.674  | 0.0048 |
| PANK1          | 2.09 | 7.839  | 7.904  | 8.339  | 7.077  | 6.972  | 6.898  | 0.0145 |
| CHEK1          | 2.09 | 8.906  | 8.969  | 9.070  | 7.978  | 7.973  | 7.811  | 0.0001 |
| G2E3           | 2.08 | 5.552  | 6.264  | 6.184  | 4.785  | 5.215  | 4.885  | 0.0249 |
| ZWILCH         | 2.08 | 9.190  | 9.470  | 9.370  | 8.261  | 8.487  | 8.091  | 0.0024 |
| LGR4           | 2.08 | 7.926  | 8.157  | 8.234  | 7.078  | 7.333  | 6.672  | 0.0166 |
| FAM69A         | 2.08 | 5.157  | 5.693  | 5.960  | 4.353  | 4.921  | 4.403  | 0.0274 |
| WDHD1          | 2.08 | 4.914  | 5.888  | 5.382  | 4.485  | 4.619  | 3.999  | 0.0459 |
| FASTKD<br>3    | 2.08 | 8.601  | 8.861  | 8.658  | 7.655  | 7.863  | 7.405  | 0.0047 |
| C1orf112       | 2.08 | 7.359  | 7.347  | 7.415  | 6.058  | 6.485  | 6.372  | 0.0122 |
| HMGB1          | 2.08 | 8.410  | 8.913  | 8.656  | 7.702  | 7.776  | 7.336  | 0.0062 |
| SGK1           | 2.08 | 8.380  | 8.488  | 8.840  | 7.472  | 7.446  | 7.650  | 0.0078 |
| DEPDC1         | 2.08 | 6.698  | 7.258  | 6.899  | 6.064  | 6.035  | 5.596  | 0.0093 |
| CCDC77         | 2.08 | 5.151  | 5.753  | 5.633  | 4.458  | 4.554  | 4.423  | 0.0260 |
| CYP1B1         | 2.08 | 9.424  | 9.757  | 9.304  | 8.556  | 8.231  | 8.549  | 0.0044 |

|              |      |        |        |        |        |        |        |        |
|--------------|------|--------|--------|--------|--------|--------|--------|--------|
| CCDC10<br>9B | 2.08 | 9.685  | 9.735  | 9.635  | 8.579  | 8.356  | 8.904  | 0.0187 |
| SVIP         | 2.08 | 6.857  | 7.407  | 7.375  | 6.143  | 6.317  | 6.071  | 0.0171 |
| SLC39A1<br>0 | 2.08 | 7.676  | 8.038  | 7.738  | 6.802  | 6.837  | 6.675  | 0.0047 |
| CD24         | 2.08 | 10.262 | 10.344 | 10.479 | 9.320  | 9.413  | 9.193  | 0.0003 |
| CNP          | 2.07 | 11.307 | 11.137 | 11.427 | 10.293 | 10.035 | 10.378 | 0.0016 |
| NEIL3        | 2.07 | 4.305  | 4.417  | 4.249  | 3.282  | 3.413  | 3.111  | 0.0015 |
| ASF1B        | 2.07 | 9.140  | 8.855  | 9.392  | 8.182  | 7.627  | 8.374  | 0.0215 |
| TSPAN12      | 2.07 | 6.387  | 7.129  | 6.763  | 5.700  | 5.984  | 5.494  | 0.0209 |
| CDC7         | 2.07 | 5.529  | 5.754  | 5.724  | 4.883  | 4.461  | 4.481  | 0.0064 |
| SEPT11       | 2.07 | 7.326  | 7.613  | 7.537  | 6.226  | 6.840  | 6.174  | 0.0246 |
| IL17RB       | 2.07 | 7.512  | 7.594  | 7.691  | 6.718  | 6.249  | 6.644  | 0.0111 |
| COQ3         | 2.07 | 9.082  | 9.164  | 9.142  | 8.257  | 7.781  | 8.162  | 0.0161 |
| WDR76        | 2.07 | 7.670  | 7.453  | 7.745  | 6.647  | 6.281  | 6.769  | 0.0066 |
| VANGL1       | 2.07 | 8.843  | 8.649  | 9.126  | 7.845  | 7.852  | 7.820  | 0.0171 |
| C4orf27      | 2.07 | 8.339  | 8.669  | 8.357  | 7.633  | 7.319  | 7.269  | 0.0026 |
| HSPA4L       | 2.06 | 6.321  | 7.030  | 6.628  | 5.657  | 5.721  | 5.544  | 0.0319 |
| CCDC77       | 2.06 | 6.682  | 6.895  | 6.722  | 6.075  | 5.742  | 5.242  | 0.0389 |
| SQLE         | 2.06 | 10.519 | 10.372 | 10.538 | 9.444  | 9.436  | 9.428  | 0.0024 |
| WDR75        | 2.06 | 7.742  | 8.415  | 7.604  | 6.784  | 7.248  | 6.673  | 0.0344 |
| CALM1        | 2.06 | 10.180 | 10.368 | 10.435 | 9.322  | 9.330  | 9.216  | 0.0014 |
| DBF4         | 2.06 | 8.198  | 8.809  | 8.583  | 7.450  | 7.766  | 7.270  | 0.0119 |
| PARP1        | 2.06 | 10.600 | 10.276 | 10.690 | 9.566  | 9.366  | 9.535  | 0.0057 |
| HAUS1        | 2.06 | 9.561  | 9.768  | 9.635  | 8.673  | 8.561  | 8.614  | 0.0006 |
| DCK          | 2.05 | 8.362  | 8.528  | 8.609  | 7.467  | 7.528  | 7.396  | 0.0010 |
| DHX9         | 2.05 | 8.321  | 8.688  | 8.797  | 7.813  | 7.626  | 7.237  | 0.0100 |
| TSEN2        | 2.05 | 7.857  | 8.194  | 8.056  | 6.947  | 7.116  | 6.945  | 0.0021 |
| SMC2         | 2.05 | 6.948  | 7.619  | 7.135  | 6.268  | 6.307  | 6.091  | 0.0271 |
| TRMT10<br>C  | 2.05 | 8.299  | 8.621  | 8.794  | 7.527  | 7.815  | 7.248  | 0.0092 |
| DFFB         | 2.05 | 6.099  | 5.781  | 6.583  | 5.153  | 4.942  | 5.346  | 0.0317 |
| SHPK         | 2.05 | 8.478  | 8.084  | 8.417  | 7.311  | 7.000  | 7.541  | 0.0074 |
| RDM1         | 2.05 | 5.815  | 5.863  | 5.847  | 4.911  | 4.561  | 4.924  | 0.0118 |
| SSX2IP       | 2.05 | 6.808  | 7.489  | 7.203  | 5.934  | 6.404  | 6.102  | 0.0168 |
| DHX9         | 2.05 | 6.680  | 6.891  | 6.995  | 5.895  | 5.949  | 5.618  | 0.0018 |
| CSE1L        | 2.05 | 9.953  | 10.476 | 10.147 | 9.036  | 9.444  | 9.003  | 0.0079 |
| TFRC         | 2.05 | 11.939 | 12.180 | 11.983 | 10.969 | 11.258 | 10.743 | 0.0087 |
| SYNCRIP      | 2.04 | 8.754  | 9.019  | 8.927  | 7.886  | 8.051  | 7.654  | 0.0029 |
| CASP8A<br>P2 | 2.04 | 5.991  | 6.170  | 6.123  | 5.324  | 4.606  | 5.171  | 0.0337 |
| PIIP5K2      | 2.04 | 6.985  | 7.604  | 7.460  | 6.456  | 6.435  | 6.109  | 0.0153 |
| SQLE         | 2.04 | 11.010 | 10.827 | 11.078 | 9.968  | 9.946  | 9.918  | 0.0041 |

|          |      |        |        |        |        |        |       |        |
|----------|------|--------|--------|--------|--------|--------|-------|--------|
| SAMHD1   | 2.04 | 6.182  | 6.505  | 6.482  | 5.361  | 5.524  | 5.195 | 0.0019 |
| DHX9     | 2.04 | 9.579  | 9.767  | 9.694  | 8.698  | 8.746  | 8.499 | 0.0006 |
| SMC2     | 2.04 | 7.312  | 7.978  | 7.437  | 6.622  | 6.709  | 6.375 | 0.0229 |
| SSX2IP   | 2.04 | 7.021  | 7.515  | 7.464  | 6.280  | 6.509  | 6.146 | 0.0082 |
| HPGD     | 2.04 | 7.490  | 7.642  | 7.922  | 6.617  | 6.726  | 6.654 | 0.0112 |
| LOC10065 | 2.04 | 7.376  | 7.439  | 7.404  | 6.490  | 6.142  | 6.476 | 0.0104 |
| SPIN4    | 2.04 | 8.783  | 8.962  | 8.717  | 7.805  | 7.877  | 7.701 | 0.0006 |
| DSCC1    | 2.04 | 8.678  | 8.796  | 8.969  | 7.721  | 7.884  | 7.762 | 0.0014 |
| RNF128   | 2.04 | 9.981  | 10.356 | 10.358 | 9.179  | 9.447  | 8.983 | 0.0051 |
| SYNCRIP  | 2.04 | 9.597  | 9.850  | 9.916  | 8.738  | 9.062  | 8.436 | 0.0139 |
| JKAMP    | 2.04 | 6.639  | 7.119  | 6.991  | 5.867  | 6.031  | 5.807 | 0.0092 |
| SFXN1    | 2.04 | 9.083  | 9.041  | 9.390  | 8.171  | 8.189  | 8.102 | 0.0085 |
| MCM2     | 2.04 | 8.473  | 8.283  | 8.507  | 7.442  | 7.118  | 7.597 | 0.0078 |
| SVIP     | 2.03 | 7.998  | 8.336  | 8.095  | 7.159  | 7.361  | 6.804 | 0.0094 |
| NUP155   | 2.03 | 8.568  | 8.765  | 8.565  | 7.593  | 7.865  | 7.331 | 0.0114 |
| SLC6A6   | 2.03 | 9.108  | 8.893  | 9.240  | 8.196  | 7.973  | 8.014 | 0.0019 |
| KIAA0528 | 2.03 | 6.313  | 7.194  | 6.732  | 5.602  | 6.129  | 5.492 | 0.0384 |
| TRIP13   | 2.03 | 9.530  | 9.567  | 9.807  | 8.544  | 8.581  | 8.723 | 0.0013 |
| CNP      | 2.03 | 10.143 | 10.080 | 10.235 | 9.071  | 9.098  | 9.225 | 0.0001 |
| BRIX1    | 2.03 | 9.016  | 9.338  | 9.235  | 8.130  | 8.399  | 7.985 | 0.0032 |
| MGST2    | 2.03 | 10.202 | 10.351 | 10.367 | 9.197  | 9.135  | 9.505 | 0.0049 |
| MRE11A   | 2.03 | 6.490  | 7.377  | 6.827  | 6.041  | 6.109  | 5.568 | 0.0402 |
| SYNCRIP  | 2.03 | 7.619  | 8.013  | 7.960  | 6.879  | 7.041  | 6.613 | 0.0044 |
| FKBP7    | 2.03 | 5.117  | 4.644  | 5.395  | 4.013  | 4.119  | 4.060 | 0.0435 |
| SQLE     | 2.03 | 10.541 | 10.376 | 10.678 | 9.531  | 9.524  | 9.499 | 0.0068 |
| HSPA4L   | 2.02 | 6.333  | 7.138  | 6.976  | 5.773  | 6.061  | 5.648 | 0.0382 |
| DHCR24   | 2.02 | 9.355  | 8.995  | 9.213  | 8.296  | 7.938  | 8.275 | 0.0030 |
| CPOX     | 2.02 | 9.349  | 9.203  | 9.453  | 8.407  | 8.283  | 8.277 | 0.0009 |
| IDI1     | 2.02 | 9.147  | 9.300  | 9.279  | 8.167  | 8.349  | 8.163 | 0.0003 |
| TIPIN    | 2.02 | 5.884  | 5.531  | 5.973  | 4.941  | 4.655  | 4.771 | 0.0057 |
| NFE2L3   | 2.02 | 7.637  | 8.137  | 7.619  | 6.739  | 6.919  | 6.750 | 0.0191 |
| ACSL3    | 2.02 | 9.694  | 10.067 | 9.783  | 8.881  | 9.102  | 8.481 | 0.0134 |
| SMC4     | 2.02 | 7.130  | 8.008  | 7.446  | 6.631  | 6.804  | 6.183 | 0.0403 |
| HSD17B2  | 2.02 | 7.413  | 7.711  | 7.628  | 6.607  | 6.322  | 6.767 | 0.0045 |
| NCAPD3   | 2.02 | 10.038 | 9.945  | 10.067 | 9.183  | 8.714  | 9.079 | 0.0141 |
| BORA     | 2.01 | 9.225  | 9.577  | 9.282  | 8.231  | 8.620  | 8.186 | 0.0052 |
| KRR1     | 2.01 | 8.382  | 8.905  | 8.603  | 7.572  | 7.894  | 7.395 | 0.0087 |
| RRM1     | 2.01 | 10.940 | 11.090 | 10.967 | 10.005 | 10.130 | 9.818 | 0.0022 |
| BORA     | 2.01 | 7.117  | 7.481  | 7.295  | 6.280  | 6.368  | 6.238 | 0.0056 |
| DEPDC1   | 2.01 | 7.152  | 7.827  | 7.203  | 6.628  | 6.550  | 6.002 | 0.0273 |



|             |      |        |        |        |        |        |        |        |
|-------------|------|--------|--------|--------|--------|--------|--------|--------|
| RAVER2      | 2.01 | 6.737  | 6.767  | 6.737  | 6.067  | 5.413  | 5.658  | 0.0321 |
| ID1         | 2.01 | 12.045 | 11.838 | 11.658 | 10.826 | 10.522 | 11.134 | 0.0124 |
| ABCD3       | 2.01 | 9.725  | 10.101 | 10.019 | 9.066  | 9.003  | 8.769  | 0.0028 |
| CCDC34      | 2.01 | 7.634  | 7.918  | 7.740  | 6.908  | 6.419  | 6.911  | 0.0119 |
| ANLN        | 2.01 | 8.105  | 8.681  | 8.632  | 7.499  | 7.728  | 7.195  | 0.0152 |
| ATR         | 2.01 | 5.532  | 6.167  | 6.074  | 5.067  | 5.193  | 4.484  | 0.0270 |
| FDXACB<br>1 | 2.01 | 6.508  | 6.310  | 6.733  | 5.660  | 5.679  | 5.177  | 0.0096 |
| SGOL2       | 2.00 | 4.110  | 4.639  | 4.512  | 3.532  | 3.561  | 3.179  | 0.0091 |
| OPA1        | 2.00 | 7.855  | 8.404  | 8.082  | 7.305  | 7.368  | 6.594  | 0.0329 |
| STIL        | 2.00 | 8.034  | 8.324  | 8.057  | 7.220  | 7.280  | 6.898  | 0.0032 |
| CDCA2       | 2.00 | 6.962  | 7.266  | 7.341  | 5.966  | 6.403  | 6.187  | 0.0043 |
| NUP107      | 2.00 | 9.926  | 10.285 | 9.971  | 9.100  | 9.280  | 8.781  | 0.0065 |
| CSE1L       | 2.00 | 11.260 | 11.622 | 11.245 | 10.345 | 10.576 | 10.215 | 0.0038 |
| MPZL3       | 0.50 | 5.591  | 5.250  | 5.080  | 6.239  | 6.352  | 6.374  | 0.0157 |
| SMOX        | 0.50 | 8.148  | 8.093  | 7.559  | 8.899  | 8.784  | 9.161  | 0.0157 |
| MTHFR       | 0.50 | 6.643  | 6.791  | 6.421  | 7.669  | 7.451  | 7.744  | 0.0023 |
| RARA        | 0.50 | 5.736  | 5.695  | 6.041  | 6.956  | 6.702  | 6.833  | 0.0026 |
| FAM129<br>A | 0.50 | 7.511  | 8.122  | 7.193  | 8.723  | 8.960  | 8.212  | 0.0456 |
| CTAGE5      | 0.50 | 6.008  | 6.291  | 5.730  | 7.073  | 7.241  | 6.735  | 0.0104 |
| RBMS2       | 0.50 | 9.083  | 9.257  | 8.936  | 9.989  | 10.233 | 10.075 | 0.0013 |
| XYLT1       | 0.50 | 4.118  | 4.443  | 4.693  | 5.523  | 5.347  | 5.453  | 0.0183 |
| MICAL2      | 0.50 | 8.143  | 8.281  | 7.866  | 9.031  | 9.208  | 9.094  | 0.0067 |
| STK19       | 0.50 | 9.475  | 9.100  | 8.930  | 10.243 | 10.050 | 10.278 | 0.0129 |
| GET4        | 0.50 | 8.420  | 8.396  | 8.478  | 9.439  | 9.335  | 9.538  | 0.0010 |
| MILR1       | 0.50 | 6.550  | 6.841  | 6.521  | 7.593  | 7.434  | 7.898  | 0.0052 |
| MXD3        | 0.49 | 8.027  | 7.888  | 7.652  | 8.900  | 8.643  | 9.062  | 0.0036 |
| RBMS2       | 0.49 | 8.940  | 9.122  | 8.702  | 9.852  | 10.070 | 9.909  | 0.0047 |
| MGLL        | 0.49 | 8.806  | 8.662  | 8.736  | 9.739  | 9.798  | 9.716  | 0.0001 |
| PRSS22      | 0.49 | 9.225  | 9.166  | 9.121  | 10.193 | 10.167 | 10.202 | 0.0003 |
| HYOU1       | 0.49 | 6.440  | 6.499  | 6.530  | 7.399  | 7.610  | 7.505  | 0.0010 |
| HYOU1       | 0.49 | 10.080 | 10.061 | 9.961  | 11.020 | 10.981 | 11.150 | 0.0002 |
| IL6R        | 0.49 | 3.815  | 3.793  | 3.923  | 4.892  | 5.086  | 4.563  | 0.0171 |
| MYEOV       | 0.49 | 10.314 | 10.075 | 10.318 | 11.246 | 11.096 | 11.415 | 0.0012 |
| MICAL2      | 0.49 | 9.454  | 9.579  | 9.192  | 10.436 | 10.557 | 10.303 | 0.0031 |
| SH3BP4      | 0.49 | 6.106  | 6.330  | 6.199  | 7.364  | 6.995  | 7.317  | 0.0040 |
| MXD1        | 0.49 | 7.785  | 7.775  | 7.583  | 8.666  | 8.908  | 8.621  | 0.0011 |
| TNNT1       | 0.49 | 6.554  | 6.824  | 6.668  | 7.669  | 7.648  | 7.802  | 0.0010 |
| SNHG8       | 0.49 | 10.538 | 10.646 | 10.334 | 11.516 | 11.545 | 11.540 | 0.0074 |
| PRSS2       | 0.49 | 8.869  | 9.184  | 8.663  | 9.943  | 9.773  | 10.095 | 0.0076 |
| DUSP3       | 0.49 | 7.554  | 7.513  | 7.541  | 8.483  | 8.685  | 8.503  | 0.0030 |
| NEBL        | 0.49 | 6.167  | 6.477  | 6.270  | 7.332  | 7.479  | 7.179  | 0.0012 |
| ACCS        | 0.49 | 6.586  | 6.031  | 6.010  | 7.302  | 7.001  | 7.441  | 0.0139 |

|                  |      |        |        |        |        |        |        |        |
|------------------|------|--------|--------|--------|--------|--------|--------|--------|
| AATK             | 0.49 | 7.665  | 7.113  | 7.296  | 8.603  | 8.018  | 8.519  | 0.0143 |
| MAP1LC<br>3B     | 0.49 | 10.323 | 10.499 | 9.960  | 11.252 | 11.475 | 11.166 | 0.0092 |
| TNNT1            | 0.49 | 7.475  | 7.456  | 7.374  | 8.538  | 8.225  | 8.596  | 0.0088 |
| DUSP3            | 0.49 | 7.527  | 7.416  | 7.597  | 8.489  | 8.657  | 8.475  | 0.0002 |
| SLFN5            | 0.49 | 4.042  | 4.708  | 3.755  | 5.254  | 5.479  | 4.989  | 0.0438 |
| SLMO1            | 0.49 | 7.480  | 7.228  | 7.460  | 8.470  | 8.210  | 8.567  | 0.0021 |
| MED19            | 0.49 | 9.096  | 9.175  | 9.036  | 10.060 | 10.162 | 10.185 | 0.0001 |
| FEM1C            | 0.49 | 7.513  | 7.881  | 7.533  | 8.694  | 9.048  | 8.199  | 0.0373 |
| ARHGAP<br>19     | 0.49 | 3.598  | 3.758  | 3.611  | 4.507  | 5.006  | 4.511  | 0.0183 |
| RRAGC            | 0.49 | 9.239  | 9.335  | 9.230  | 10.225 | 10.636 | 9.977  | 0.0310 |
| TRIO             | 0.49 | 6.810  | 6.865  | 6.568  | 7.654  | 8.166  | 7.453  | 0.0272 |
| LOC1005<br>10707 | 0.49 | 7.596  | 7.572  | 7.496  | 8.575  | 8.699  | 8.498  | 0.0006 |
| C6orf48          | 0.49 | 11.682 | 11.827 | 11.375 | 12.641 | 12.734 | 12.659 | 0.0128 |
| ASB1             | 0.49 | 8.813  | 8.770  | 8.717  | 9.708  | 9.693  | 9.996  | 0.0058 |
| BCL9L            | 0.49 | 7.843  | 7.926  | 8.149  | 9.108  | 9.019  | 8.919  | 0.0016 |
| MYEOV            | 0.49 | 8.599  | 8.567  | 8.756  | 9.753  | 9.517  | 9.770  | 0.0008 |
| SPIRE1           | 0.49 | 7.805  | 8.400  | 7.816  | 8.913  | 9.426  | 8.813  | 0.0188 |
| TEF              | 0.49 | 7.403  | 7.289  | 7.148  | 8.298  | 8.146  | 8.509  | 0.0020 |
| C7orf13          | 0.49 | 7.339  | 7.496  | 7.099  | 8.308  | 8.343  | 8.433  | 0.0071 |
| SLMO1            | 0.49 | 4.296  | 4.321  | 3.944  | 5.486  | 4.858  | 5.303  | 0.0140 |
| SNHG1            | 0.49 | 9.858  | 10.037 | 9.790  | 10.792 | 10.937 | 11.079 | 0.0008 |
| FLNB             | 0.48 | 10.584 | 10.540 | 10.306 | 11.480 | 11.586 | 11.524 | 0.0032 |
| NBR2             | 0.48 | 7.138  | 7.511  | 7.286  | 8.404  | 8.392  | 8.309  | 0.0070 |
| CCDC92           | 0.48 | 7.956  | 8.124  | 7.821  | 9.036  | 8.968  | 9.065  | 0.0036 |
| FSTL3            | 0.48 | 4.678  | 4.422  | 5.175  | 5.919  | 5.877  | 5.736  | 0.0326 |
| DUSP10           | 0.48 | 5.850  | 5.816  | 5.671  | 6.791  | 6.791  | 6.924  | 0.0002 |
| C17orf51         | 0.48 | 6.224  | 6.127  | 6.158  | 7.385  | 7.146  | 7.133  | 0.0029 |
| FHL2             | 0.48 | 11.100 | 11.250 | 10.477 | 12.010 | 12.017 | 12.077 | 0.0429 |
| MED19            | 0.48 | 9.657  | 9.707  | 9.506  | 10.687 | 10.687 | 10.672 | 0.0031 |
| TRIM25           | 0.48 | 5.993  | 6.074  | 5.937  | 7.179  | 6.896  | 7.089  | 0.0018 |
| RRAGC            | 0.48 | 9.404  | 9.463  | 9.454  | 10.454 | 10.747 | 10.248 | 0.0175 |
| GLIS2            | 0.48 | 8.672  | 8.554  | 8.515  | 9.659  | 9.563  | 9.693  | 0.0001 |
| C1orf116         | 0.48 | 8.671  | 8.614  | 8.368  | 9.717  | 9.178  | 9.863  | 0.0238 |
| CYTH3            | 0.48 | 8.768  | 8.797  | 8.793  | 9.833  | 9.853  | 9.848  | 0.0000 |
| PABPC1<br>L      | 0.48 | 8.632  | 8.728  | 8.280  | 9.620  | 9.442  | 9.775  | 0.0044 |
| ZNFX1-A<br>S1    | 0.48 | 12.027 | 12.044 | 11.741 | 12.964 | 13.074 | 12.976 | 0.0042 |
| TNNT1            | 0.48 | 6.779  | 6.807  | 6.913  | 7.821  | 7.811  | 8.043  | 0.0010 |
| COX19            | 0.48 | 6.351  | 6.377  | 6.184  | 7.555  | 7.175  | 7.352  | 0.0031 |
| KLF4             | 0.48 | 9.890  | 9.864  | 9.632  | 10.928 | 10.672 | 10.972 | 0.0011 |

|               |      |        |        |        |        |        |        |        |
|---------------|------|--------|--------|--------|--------|--------|--------|--------|
| TMC4          | 0.48 | 8.406  | 8.375  | 7.932  | 9.264  | 9.138  | 9.531  | 0.0062 |
| LPP           | 0.48 | 5.502  | 5.494  | 5.515  | 6.568  | 6.696  | 6.439  | 0.0046 |
| CCRN4L        | 0.48 | 5.460  | 5.111  | 5.123  | 6.505  | 5.987  | 6.393  | 0.0070 |
| CLDN15        | 0.48 | 6.480  | 6.758  | 6.839  | 7.657  | 7.960  | 7.679  | 0.0019 |
| STX5          | 0.48 | 6.540  | 6.468  | 6.342  | 7.375  | 7.549  | 7.640  | 0.0006 |
| RCAN1         | 0.48 | 6.706  | 6.608  | 6.188  | 7.869  | 7.397  | 7.458  | 0.0079 |
| KCNJ14        | 0.48 | 5.179  | 5.402  | 5.457  | 6.287  | 6.529  | 6.446  | 0.0007 |
| MORN4         | 0.47 | 6.349  | 6.464  | 5.965  | 7.296  | 7.234  | 7.504  | 0.0074 |
| HYOU1         | 0.47 | 8.984  | 9.079  | 8.993  | 10.098 | 10.002 | 10.184 | 0.0003 |
| WARS          | 0.47 | 10.756 | 10.962 | 10.416 | 11.780 | 11.891 | 11.749 | 0.0153 |
| HSPB8         | 0.47 | 4.609  | 4.635  | 4.493  | 5.709  | 5.859  | 5.374  | 0.0119 |
| LOC100506403  | 0.47 | 6.672  | 6.939  | 7.005  | 8.118  | 7.644  | 8.075  | 0.0063 |
| RRAGC         | 0.47 | 8.967  | 9.071  | 9.088  | 10.058 | 10.357 | 9.938  | 0.0085 |
| MORN4         | 0.47 | 5.250  | 5.003  | 4.328  | 6.065  | 5.840  | 6.070  | 0.0460 |
| HKDC1         | 0.47 | 7.127  | 7.389  | 6.623  | 8.125  | 8.165  | 8.207  | 0.0367 |
| SPINT1        | 0.47 | 6.870  | 6.682  | 6.674  | 7.836  | 7.845  | 7.813  | 0.0029 |
| WARS          | 0.47 | 10.055 | 10.365 | 9.699  | 11.136 | 11.192 | 11.128 | 0.0275 |
| WARS          | 0.47 | 9.859  | 10.265 | 9.608  | 10.997 | 11.164 | 10.901 | 0.0175 |
| WIPI1         | 0.47 | 6.007  | 6.099  | 5.745  | 6.930  | 7.296  | 6.877  | 0.0035 |
| C10orf54      | 0.47 | 7.432  | 7.353  | 7.420  | 8.391  | 8.499  | 8.576  | 0.0005 |
| EIF1B         | 0.47 | 8.948  | 8.992  | 8.939  | 9.973  | 10.140 | 10.031 | 0.0008 |
| SPIRE1        | 0.47 | 5.937  | 6.415  | 5.566  | 7.207  | 7.274  | 6.791  | 0.0253 |
| TFE3          | 0.47 | 6.656  | 6.838  | 6.294  | 7.650  | 7.290  | 8.068  | 0.0214 |
| C3orf52       | 0.47 | 8.824  | 8.996  | 8.683  | 10.042 | 9.791  | 9.951  | 0.0009 |
| FHL2          | 0.47 | 10.354 | 10.565 | 9.672  | 11.248 | 11.325 | 11.444 | 0.0462 |
| FHL2          | 0.47 | 10.886 | 11.025 | 10.217 | 11.749 | 11.872 | 11.916 | 0.0404 |
| GABARAPL1     | 0.47 | 5.373  | 4.999  | 5.293  | 6.233  | 6.545  | 6.185  | 0.0024 |
| MXD3          | 0.47 | 7.293  | 7.374  | 6.903  | 8.211  | 8.376  | 8.323  | 0.0105 |
| SLC26A11      | 0.47 | 6.017  | 6.034  | 6.050  | 7.183  | 6.884  | 7.306  | 0.0126 |
| RNF187        | 0.47 | 8.390  | 8.456  | 8.286  | 9.485  | 9.391  | 9.560  | 0.0001 |
| LONP1         | 0.47 | 9.937  | 10.135 | 9.436  | 11.012 | 10.763 | 11.105 | 0.0179 |
| U2AF1L4       | 0.47 | 6.924  | 6.694  | 6.891  | 7.906  | 7.840  | 8.071  | 0.0004 |
| FKBP1A-SDCBP2 | 0.47 | 7.570  | 6.974  | 7.560  | 8.347  | 8.727  | 8.385  | 0.0133 |
| TNNC1         | 0.47 | 6.605  | 6.694  | 6.448  | 7.555  | 7.592  | 7.897  | 0.0019 |
| RRAGC         | 0.47 | 8.220  | 8.349  | 8.273  | 9.316  | 9.603  | 9.211  | 0.0068 |
| LMCD1         | 0.47 | 9.078  | 9.094  | 9.018  | 10.184 | 9.951  | 10.344 | 0.0085 |
| PXDC1         | 0.46 | 8.109  | 8.113  | 7.931  | 9.201  | 8.986  | 9.272  | 0.0008 |
| SEMA3B        | 0.46 | 7.264  | 7.040  | 7.171  | 8.236  | 8.355  | 8.212  | 0.0003 |
| NEBL          | 0.46 | 7.606  | 8.225  | 7.473  | 8.852  | 9.331  | 8.423  | 0.0354 |
| LONP1         | 0.46 | 9.886  | 10.031 | 9.424  | 10.967 | 10.735 | 11.032 | 0.0125 |

|               |      |        |        |        |        |        |        |        |
|---------------|------|--------|--------|--------|--------|--------|--------|--------|
| LONP1         | 0.46 | 9.922  | 10.123 | 9.458  | 11.019 | 10.771 | 11.116 | 0.0144 |
| FOSL1         | 0.46 | 7.965  | 7.594  | 7.999  | 9.062  | 8.751  | 9.101  | 0.0030 |
| RCAN1         | 0.46 | 7.881  | 8.063  | 7.772  | 9.098  | 9.057  | 8.923  | 0.0009 |
| C6orf48       | 0.46 | 11.611 | 11.763 | 11.272 | 12.622 | 12.722 | 12.709 | 0.0128 |
| ZMYM5         | 0.46 | 5.191  | 5.053  | 4.495  | 5.979  | 6.369  | 5.799  | 0.0154 |
| PNRC1         | 0.46 | 7.507  | 7.535  | 7.196  | 8.637  | 8.285  | 8.689  | 0.0028 |
| HIST1H2<br>AC | 0.46 | 6.979  | 7.081  | 7.078  | 8.133  | 8.085  | 8.304  | 0.0007 |
| RCAN1         | 0.46 | 7.862  | 8.125  | 7.720  | 9.154  | 9.072  | 8.906  | 0.0026 |
| OSGIN1        | 0.45 | 6.507  | 6.263  | 6.371  | 7.481  | 7.507  | 7.571  | 0.0014 |
| RBCK1         | 0.45 | 8.095  | 8.339  | 7.782  | 9.243  | 9.131  | 9.298  | 0.0130 |
| CLIP4         | 0.45 | 4.159  | 3.777  | 3.818  | 5.147  | 5.086  | 4.955  | 0.0042 |
| EIF1B         | 0.45 | 9.110  | 9.296  | 9.208  | 10.261 | 10.459 | 10.312 | 0.0001 |
| MAP3K1<br>4   | 0.45 | 5.429  | 5.396  | 5.541  | 6.795  | 6.340  | 6.636  | 0.0082 |
| HMOX1         | 0.45 | 6.559  | 6.572  | 6.906  | 7.732  | 8.024  | 7.734  | 0.0017 |
| NABP1         | 0.45 | 7.397  | 7.685  | 7.423  | 8.756  | 8.769  | 8.425  | 0.0016 |
| LOC3922<br>88 | 0.45 | 10.419 | 10.628 | 10.054 | 11.531 | 11.661 | 11.411 | 0.0104 |
| GFPT1         | 0.45 | 8.785  | 9.525  | 8.590  | 10.025 | 10.563 | 9.842  | 0.0334 |
| PPP2R5B       | 0.45 | 7.804  | 7.512  | 7.914  | 8.965  | 8.859  | 8.895  | 0.0073 |
| SQSTM1        | 0.45 | 10.850 | 10.891 | 10.782 | 11.888 | 12.147 | 11.951 | 0.0015 |
| CLCN4         | 0.45 | 4.512  | 4.856  | 4.980  | 6.171  | 5.779  | 5.889  | 0.0034 |
| AK2           | 0.45 | 6.541  | 6.512  | 6.386  | 7.471  | 7.827  | 7.617  | 0.0027 |
| SMOX          | 0.45 | 7.436  | 7.429  | 6.605  | 8.445  | 8.256  | 8.404  | 0.0432 |
| ZMYM6         | 0.45 | 6.214  | 6.370  | 6.317  | 7.425  | 7.643  | 7.313  | 0.0021 |
| PRSS1         | 0.45 | 7.837  | 8.349  | 7.665  | 9.123  | 8.938  | 9.353  | 0.0130 |
| ADM2          | 0.44 | 5.856  | 5.587  | 5.360  | 6.887  | 6.530  | 6.911  | 0.0037 |
| CCDC13<br>0   | 0.44 | 6.383  | 6.435  | 6.000  | 7.483  | 7.284  | 7.594  | 0.0034 |
| CDKN1A        | 0.44 | 8.226  | 8.280  | 7.786  | 9.199  | 9.270  | 9.390  | 0.0101 |
| SERPINB<br>8  | 0.44 | 7.181  | 7.116  | 7.325  | 8.236  | 8.713  | 8.150  | 0.0140 |
| SEC24D        | 0.44 | 6.482  | 6.604  | 6.619  | 7.516  | 8.220  | 7.359  | 0.0475 |
| GDF15         | 0.44 | 11.837 | 11.670 | 10.907 | 12.663 | 12.607 | 12.842 | 0.0432 |
| AKNA          | 0.44 | 4.771  | 5.018  | 4.377  | 6.029  | 5.865  | 5.885  | 0.0175 |
| CHD2          | 0.44 | 6.313  | 6.856  | 5.933  | 7.666  | 7.783  | 7.312  | 0.0269 |
| SLPI          | 0.44 | 9.745  | 9.908  | 9.213  | 10.861 | 10.617 | 11.002 | 0.0142 |
| SPIRE1        | 0.44 | 7.889  | 8.295  | 7.496  | 9.043  | 9.435  | 8.795  | 0.0170 |
| TMEM45<br>B   | 0.44 | 5.952  | 6.021  | 5.706  | 7.090  | 7.182  | 6.974  | 0.0011 |
| AMN1          | 0.44 | 7.180  | 7.462  | 7.022  | 8.299  | 8.652  | 8.281  | 0.0026 |
| RIOK3         | 0.44 | 7.994  | 8.225  | 7.821  | 9.081  | 9.624  | 8.807  | 0.0243 |
| GFPT1         | 0.44 | 9.557  | 10.016 | 9.371  | 10.758 | 11.170 | 10.598 | 0.0100 |

|          |      |        |        |        |        |        |        |        |
|----------|------|--------|--------|--------|--------|--------|--------|--------|
| C20orf11 | 0.44 | 8.880  | 8.940  | 8.735  | 9.951  | 10.088 | 10.091 | 0.0002 |
| 1        |      |        |        |        |        |        |        |        |
| MPZL3    | 0.44 | 8.930  | 9.025  | 8.744  | 10.218 | 10.128 | 9.924  | 0.0006 |
| CDKN1A   | 0.44 | 10.023 | 9.961  | 9.390  | 10.984 | 10.996 | 11.054 | 0.0251 |
| CLIP4    | 0.44 | 3.651  | 3.729  | 3.891  | 4.548  | 5.274  | 4.951  | 0.0219 |
| RCAN1    | 0.44 | 7.491  | 7.663  | 7.351  | 8.894  | 8.522  | 8.667  | 0.0012 |
| GADD45   | 0.44 | 10.028 | 9.941  | 9.427  | 11.190 | 10.710 | 11.109 | 0.0083 |
| A        |      |        |        |        |        |        |        |        |
| AGR2     | 0.44 | 11.232 | 11.377 | 11.080 | 12.315 | 12.559 | 12.407 | 0.0005 |
| TMEM80   | 0.44 | 6.584  | 6.738  | 6.803  | 8.077  | 7.784  | 7.846  | 0.0007 |
| ETS1     | 0.44 | 4.754  | 4.398  | 4.610  | 5.947  | 5.599  | 5.813  | 0.0012 |
| TCP11L2  | 0.43 | 5.107  | 4.947  | 4.239  | 5.960  | 6.111  | 5.971  | 0.0388 |
| PNRC1    | 0.43 | 8.967  | 9.113  | 8.584  | 10.150 | 10.027 | 10.150 | 0.0121 |
| KDM6B    | 0.43 | 4.733  | 5.061  | 4.559  | 6.002  | 5.953  | 6.059  | 0.0116 |
| AKNA     | 0.43 | 7.047  | 6.885  | 6.829  | 8.132  | 8.027  | 8.222  | 0.0002 |
| EPHX2    | 0.43 | 4.885  | 4.972  | 4.732  | 5.901  | 6.179  | 6.131  | 0.0005 |
| PLCXD2   | 0.43 | 6.953  | 7.434  | 6.533  | 8.496  | 7.843  | 8.275  | 0.0221 |
| TNFRSF1  | 0.43 | 11.243 | 11.129 | 11.024 | 12.303 | 12.178 | 12.531 | 0.0014 |
| 2A       |      |        |        |        |        |        |        |        |
| LAMB3    | 0.43 | 8.077  | 7.995  | 7.814  | 9.222  | 9.364  | 8.907  | 0.0036 |
| SEMA3B   | 0.43 | 6.768  | 6.221  | 6.364  | 7.643  | 7.709  | 7.691  | 0.0162 |
| HDAC9    | 0.43 | 5.480  | 5.985  | 5.715  | 6.843  | 7.291  | 6.648  | 0.0088 |
| EXD3     | 0.43 | 6.042  | 6.210  | 5.832  | 7.128  | 7.307  | 7.302  | 0.0021 |
| NBR2     | 0.43 | 6.358  | 6.959  | 6.268  | 7.562  | 7.830  | 7.911  | 0.0155 |
| CREB3L   | 0.43 | 5.998  | 5.903  | 5.652  | 7.127  | 6.978  | 7.109  | 0.0023 |
| 2        |      |        |        |        |        |        |        |        |
| ZNF185   | 0.43 | 5.540  | 5.639  | 5.912  | 6.870  | 7.130  | 6.738  | 0.0016 |
| KDM6B    | 0.43 | 4.623  | 4.990  | 4.507  | 5.924  | 5.833  | 6.059  | 0.0059 |
| SERPINB  | 0.43 | 6.105  | 6.499  | 5.925  | 7.325  | 7.583  | 7.329  | 0.0078 |
| 8        |      |        |        |        |        |        |        |        |
| RNF187   | 0.43 | 5.542  | 5.578  | 5.222  | 6.580  | 6.625  | 6.815  | 0.0017 |
| RELB     | 0.43 | 7.762  | 7.821  | 7.682  | 8.914  | 8.999  | 9.018  | 0.0000 |
| ITPKC    | 0.43 | 7.118  | 6.885  | 6.634  | 8.216  | 7.745  | 8.325  | 0.0067 |
| HERC4    | 0.43 | 5.555  | 5.616  | 5.521  | 6.960  | 6.715  | 6.683  | 0.0026 |
| INPP4B   | 0.43 | 5.360  | 4.623  | 5.690  | 6.416  | 6.734  | 6.394  | 0.0428 |
| GJB3     | 0.43 | 8.502  | 8.345  | 8.558  | 9.702  | 9.637  | 9.773  | 0.0003 |
| AMOTL2   | 0.42 | 7.782  | 7.803  | 7.476  | 9.112  | 8.547  | 9.068  | 0.0083 |
| ZMYM5    | 0.42 | 7.071  | 7.352  | 6.847  | 8.183  | 8.631  | 8.166  | 0.0043 |
| CARD9    | 0.42 | 4.089  | 4.177  | 4.318  | 5.779  | 5.065  | 5.383  | 0.0197 |
| HMOX1    | 0.42 | 7.407  | 7.407  | 7.483  | 8.549  | 8.978  | 8.457  | 0.0149 |
| YPEL5    | 0.42 | 7.245  | 7.790  | 7.166  | 8.502  | 9.043  | 8.407  | 0.0110 |
| GDF15    | 0.42 | 11.768 | 11.595 | 10.783 | 12.594 | 12.573 | 12.903 | 0.0381 |
| RIOK3    | 0.42 | 9.934  | 10.302 | 9.733  | 11.170 | 11.609 | 10.940 | 0.0089 |
| ELL2     | 0.42 | 6.398  | 6.623  | 6.300  | 7.782  | 7.658  | 7.671  | 0.0021 |

|           |      |        |        |        |        |        |        |        |
|-----------|------|--------|--------|--------|--------|--------|--------|--------|
| EGR2      | 0.42 | 4.932  | 4.403  | 4.343  | 5.897  | 5.392  | 6.153  | 0.0134 |
| ABHD4     | 0.41 | 7.318  | 7.435  | 7.023  | 8.502  | 8.465  | 8.643  | 0.0035 |
| FOSL1     | 0.41 | 7.353  | 7.052  | 7.396  | 8.620  | 8.141  | 8.809  | 0.0106 |
| GOLT1A    | 0.41 | 9.125  | 9.213  | 8.891  | 10.190 | 10.588 | 10.267 | 0.0015 |
| VIMP      | 0.41 | 6.789  | 6.962  | 6.590  | 7.966  | 8.206  | 8.021  | 0.0011 |
| CREB3L2   | 0.41 | 5.974  | 5.900  | 5.568  | 7.206  | 6.915  | 7.181  | 0.0016 |
| MAP1LC3B  | 0.41 | 9.715  | 9.853  | 9.112  | 10.930 | 10.966 | 10.721 | 0.0200 |
| NA        | 0.41 | 4.174  | 3.751  | 4.047  | 5.404  | 5.558  | 4.781  | 0.0180 |
| C17orf110 | 0.41 | 6.381  | 6.509  | 6.306  | 7.371  | 7.787  | 7.853  | 0.0070 |
| HMOX1     | 0.41 | 8.286  | 8.286  | 8.336  | 9.334  | 9.913  | 9.459  | 0.0180 |
| GDF15     | 0.41 | 11.258 | 11.096 | 10.261 | 12.122 | 12.095 | 12.424 | 0.0378 |
| MPZL3     | 0.41 | 6.129  | 6.115  | 5.966  | 7.325  | 7.339  | 7.434  | 0.0001 |
| CREBRF    | 0.41 | 3.870  | 4.517  | 3.799  | 5.075  | 5.951  | 4.957  | 0.0354 |
| LGALS4    | 0.41 | 9.383  | 9.690  | 8.843  | 10.642 | 10.514 | 10.774 | 0.0246 |
| FKBP14    | 0.41 | 5.767  | 6.234  | 5.893  | 7.197  | 7.526  | 7.086  | 0.0025 |
| PARD6B    | 0.40 | 8.092  | 8.385  | 8.179  | 9.576  | 9.443  | 9.565  | 0.0010 |
| FOSL1     | 0.40 | 7.341  | 6.947  | 7.436  | 8.708  | 8.145  | 8.766  | 0.0078 |
| NABP1     | 0.40 | 6.788  | 6.976  | 6.864  | 8.285  | 8.142  | 8.146  | 0.0001 |
| MEF2D     | 0.40 | 8.101  | 8.173  | 7.656  | 9.391  | 8.972  | 9.510  | 0.0046 |
| C17orf110 | 0.40 | 6.499  | 6.793  | 6.035  | 7.670  | 7.837  | 7.865  | 0.0197 |
| ELL2      | 0.40 | 5.892  | 6.149  | 5.787  | 7.290  | 7.333  | 7.178  | 0.0023 |
| LAMB3     | 0.40 | 10.180 | 10.209 | 9.800  | 11.394 | 11.415 | 11.373 | 0.0092 |
| AGR2      | 0.40 | 9.053  | 9.329  | 8.922  | 10.240 | 10.529 | 10.518 | 0.0012 |
| RIOK3     | 0.40 | 8.383  | 8.719  | 7.997  | 9.593  | 10.112 | 9.358  | 0.0124 |
| RBCK1     | 0.40 | 8.721  | 8.899  | 8.247  | 10.010 | 9.836  | 10.079 | 0.0120 |
| RIOK3     | 0.40 | 8.783  | 9.230  | 8.636  | 10.036 | 10.687 | 9.852  | 0.0168 |
| CHIC2     | 0.40 | 8.855  | 8.900  | 8.579  | 10.267 | 10.077 | 10.003 | 0.0006 |
| TMEM184A  | 0.40 | 5.107  | 5.360  | 5.321  | 6.735  | 6.478  | 6.591  | 0.0003 |
| BTG1      | 0.40 | 9.755  | 9.810  | 8.818  | 10.922 | 10.861 | 10.810 | 0.0476 |
| PRKAB2    | 0.39 | 7.125  | 7.584  | 7.200  | 8.719  | 8.822  | 8.414  | 0.0021 |
| BTG1      | 0.39 | 8.910  | 9.047  | 8.081  | 10.108 | 10.081 | 10.080 | 0.0428 |
| HKDC1     | 0.39 | 9.864  | 10.176 | 9.152  | 11.153 | 11.216 | 11.059 | 0.0405 |
| GEM       | 0.39 | 4.184  | 4.817  | 4.069  | 5.626  | 6.108  | 5.430  | 0.0119 |
| ARMCX3    | 0.39 | 8.082  | 8.466  | 8.266  | 9.546  | 10.055 | 9.162  | 0.0230 |
| AXL       | 0.39 | 5.951  | 5.715  | 6.004  | 7.185  | 7.463  | 7.077  | 0.0010 |
| C17orf110 | 0.39 | 7.057  | 7.244  | 6.776  | 8.270  | 8.452  | 8.461  | 0.0036 |
| ARMCX3    | 0.39 | 7.608  | 8.103  | 7.753  | 9.150  | 9.577  | 8.742  | 0.0144 |
| ELL2      | 0.39 | 5.210  | 5.710  | 5.433  | 6.809  | 6.805  | 6.864  | 0.0099 |

|                   |      |        |        |        |        |        |        |        |
|-------------------|------|--------|--------|--------|--------|--------|--------|--------|
| LETM2             | 0.39 | 8.301  | 8.414  | 8.288  | 9.600  | 9.722  | 9.766  | 0.0000 |
| ARID3B            | 0.39 | 5.826  | 5.776  | 5.927  | 7.171  | 7.332  | 7.120  | 0.0001 |
| PTPRH             | 0.39 | 8.416  | 8.471  | 7.834  | 9.638  | 9.493  | 9.763  | 0.0122 |
| C4BPB             | 0.39 | 5.620  | 5.501  | 6.194  | 7.315  | 7.270  | 6.911  | 0.0090 |
| DUSP1             | 0.39 | 5.756  | 5.178  | 5.253  | 6.957  | 6.595  | 6.809  | 0.0056 |
| SCEL              | 0.39 | 5.364  | 6.513  | 5.644  | 7.162  | 7.768  | 6.813  | 0.0361 |
| SCEL              | 0.38 | 6.676  | 7.572  | 7.126  | 8.314  | 9.031  | 8.144  | 0.0218 |
| MAP1LC<br>3B      | 0.38 | 8.422  | 8.537  | 7.771  | 9.764  | 9.670  | 9.539  | 0.0212 |
| LURAP1<br>L       | 0.38 | 8.077  | 8.213  | 7.065  | 9.416  | 8.984  | 9.314  | 0.0440 |
| FOSL1             | 0.38 | 8.671  | 8.518  | 8.749  | 10.163 | 9.746  | 10.153 | 0.0032 |
| FKBP14            | 0.38 | 5.336  | 5.562  | 5.379  | 6.999  | 6.968  | 6.411  | 0.0115 |
| MKNK2             | 0.38 | 8.848  | 9.167  | 8.848  | 10.316 | 10.529 | 10.198 | 0.0007 |
| FKBP1A-<br>SDCBP2 | 0.38 | 7.166  | 7.214  | 7.270  | 8.402  | 8.862  | 8.544  | 0.0073 |
| C1orf116          | 0.38 | 8.302  | 8.257  | 7.964  | 9.571  | 9.393  | 9.774  | 0.0008 |
| RBCK1             | 0.37 | 8.241  | 8.622  | 7.882  | 9.806  | 9.511  | 9.764  | 0.0112 |
| ABHD4             | 0.37 | 5.546  | 5.728  | 5.417  | 7.118  | 6.866  | 6.977  | 0.0003 |
| DUSP1             | 0.37 | 5.858  | 5.374  | 5.400  | 7.170  | 6.528  | 7.177  | 0.0077 |
| LAMP3             | 0.37 | 4.370  | 4.572  | 4.633  | 5.873  | 6.306  | 5.616  | 0.0112 |
| KRT7              | 0.37 | 8.067  | 8.297  | 7.948  | 9.463  | 9.639  | 9.542  | 0.0012 |
| MAP3K1<br>4       | 0.37 | 7.070  | 6.853  | 6.690  | 8.538  | 7.696  | 8.570  | 0.0272 |
| ELL2              | 0.37 | 6.785  | 7.352  | 7.148  | 8.653  | 8.698  | 8.285  | 0.0028 |
| NABP1             | 0.37 | 7.321  | 7.616  | 7.315  | 9.018  | 8.893  | 8.689  | 0.0005 |
| GTPBP2            | 0.37 | 8.939  | 9.121  | 7.995  | 10.298 | 9.904  | 10.397 | 0.0339 |
| LOC1005<br>09764  | 0.36 | 6.661  | 6.671  | 6.542  | 8.069  | 7.960  | 8.213  | 0.0003 |
| EPB41L4<br>A-AS1  | 0.36 | 10.447 | 10.648 | 10.094 | 11.795 | 11.931 | 11.912 | 0.0083 |
| PER1              | 0.36 | 5.064  | 4.634  | 5.086  | 6.483  | 5.988  | 6.698  | 0.0065 |
| FOXA3             | 0.36 | 5.867  | 5.725  | 5.167  | 7.281  | 6.889  | 7.120  | 0.0079 |
| YPEL5             | 0.36 | 8.630  | 9.047  | 8.292  | 10.137 | 10.408 | 9.960  | 0.0074 |
| MAP2              | 0.35 | 5.155  | 5.324  | 5.849  | 6.709  | 7.282  | 6.854  | 0.0057 |
| PTPRH             | 0.35 | 6.431  | 6.839  | 5.818  | 7.921  | 7.837  | 7.998  | 0.0318 |
| SCEL              | 0.35 | 6.433  | 7.442  | 6.663  | 8.224  | 8.885  | 7.969  | 0.0214 |
| C10orf54          | 0.35 | 5.176  | 5.286  | 5.115  | 6.941  | 6.737  | 6.366  | 0.0082 |
| MIR22             | 0.35 | 5.592  | 5.924  | 5.692  | 7.213  | 7.166  | 7.369  | 0.0005 |
| SCEL              | 0.35 | 5.659  | 6.691  | 5.826  | 7.538  | 8.094  | 7.166  | 0.0222 |
| ABHD4             | 0.35 | 5.698  | 5.564  | 5.679  | 7.146  | 7.221  | 7.128  | 0.0000 |
| GTPBP2            | 0.35 | 6.609  | 6.505  | 5.728  | 8.041  | 7.551  | 7.910  | 0.0155 |
| DUSP10            | 0.35 | 4.300  | 4.501  | 4.274  | 5.810  | 5.791  | 6.035  | 0.0001 |
| DUSP10            | 0.35 | 5.331  | 4.890  | 4.682  | 6.425  | 6.396  | 6.704  | 0.0057 |

|           |      |        |        |        |        |        |        |        |
|-----------|------|--------|--------|--------|--------|--------|--------|--------|
| NBR2      | 0.35 | 6.270  | 6.681  | 5.489  | 7.705  | 7.769  | 7.789  | 0.0435 |
| LCN2      | 0.35 | 11.134 | 11.503 | 10.796 | 12.647 | 12.767 | 12.691 | 0.0147 |
| MIR22     | 0.35 | 6.838  | 7.047  | 6.922  | 8.524  | 8.422  | 8.470  | 0.0002 |
| JUN       | 0.35 | 9.479  | 9.329  | 9.488  | 11.139 | 10.485 | 11.181 | 0.0177 |
| CSRNP1    | 0.35 | 7.694  | 7.382  | 7.475  | 9.086  | 8.614  | 9.374  | 0.0113 |
| SCEL      | 0.34 | 5.451  | 6.271  | 5.709  | 7.298  | 7.803  | 6.931  | 0.0119 |
| SCEL      | 0.34 | 5.867  | 7.008  | 6.016  | 7.774  | 8.319  | 7.589  | 0.0268 |
| MAP2      | 0.34 | 4.570  | 4.965  | 4.674  | 6.254  | 6.768  | 5.601  | 0.0372 |
| TMEM217   | 0.34 | 5.197  | 4.461  | 4.834  | 6.401  | 6.144  | 6.620  | 0.0058 |
| KLF6      | 0.34 | 8.761  | 8.663  | 8.521  | 10.322 | 10.196 | 10.098 | 0.0001 |
| JUN       | 0.34 | 7.842  | 7.771  | 7.893  | 9.612  | 8.914  | 9.565  | 0.0190 |
| ARID3B    | 0.34 | 7.976  | 8.004  | 8.293  | 9.613  | 9.741  | 9.650  | 0.0016 |
| DNAJB9    | 0.34 | 8.308  | 9.102  | 8.355  | 10.150 | 10.414 | 10.033 | 0.0134 |
| PRKAB2    | 0.33 | 5.415  | 5.441  | 5.335  | 6.867  | 7.453  | 6.455  | 0.0328 |
| KLF6      | 0.33 | 8.933  | 8.903  | 8.768  | 10.568 | 10.488 | 10.327 | 0.0001 |
| GABARAPL1 | 0.33 | 6.481  | 6.423  | 5.876  | 7.815  | 7.909  | 7.917  | 0.0120 |
| FKBP14    | 0.33 | 4.768  | 5.137  | 4.798  | 6.483  | 6.816  | 6.146  | 0.0044 |
| JUN       | 0.33 | 8.596  | 8.361  | 8.496  | 10.225 | 9.717  | 10.254 | 0.0059 |
| CLIP4     | 0.33 | 5.805  | 5.882  | 5.503  | 7.588  | 7.355  | 7.059  | 0.0015 |
| JUN       | 0.32 | 8.532  | 8.411  | 8.510  | 10.322 | 9.664  | 10.299 | 0.0153 |
| LINC00341 | 0.32 | 5.113  | 5.193  | 4.378  | 6.730  | 6.355  | 6.649  | 0.0122 |
| C2orf54   | 0.32 | 5.096  | 5.114  | 5.207  | 6.570  | 7.209  | 6.478  | 0.0179 |
| CLDN1     | 0.32 | 9.014  | 9.313  | 8.103  | 10.688 | 10.448 | 10.508 | 0.0368 |
| AIM1L     | 0.32 | 7.200  | 7.261  | 6.920  | 8.781  | 8.571  | 8.993  | 0.0006 |
| CLDN1     | 0.32 | 9.395  | 9.628  | 8.528  | 11.032 | 10.850 | 10.871 | 0.0322 |
| KLF6      | 0.31 | 7.037  | 6.866  | 6.743  | 8.700  | 8.606  | 8.345  | 0.0003 |
| MIR22     | 0.31 | 5.867  | 6.399  | 5.885  | 7.838  | 7.633  | 7.761  | 0.0058 |
| ARG2      | 0.31 | 7.543  | 8.026  | 7.026  | 9.178  | 9.468  | 9.123  | 0.0173 |
| MIR22     | 0.31 | 6.506  | 7.033  | 6.734  | 8.569  | 8.336  | 8.443  | 0.0029 |
| ZFAND2A   | 0.31 | 9.260  | 9.304  | 9.228  | 10.800 | 11.006 | 11.020 | 0.0008 |
| CST6      | 0.31 | 6.123  | 6.041  | 6.548  | 7.657  | 8.270  | 7.824  | 0.0024 |
| DUSP5     | 0.31 | 9.089  | 9.135  | 8.809  | 10.732 | 10.561 | 10.817 | 0.0003 |
| CLDN1     | 0.31 | 6.926  | 6.838  | 6.040  | 8.433  | 8.241  | 8.350  | 0.0218 |
| NIT1      | 0.31 | 5.592  | 5.159  | 5.102  | 6.992  | 6.985  | 7.008  | 0.0080 |
| DUSP8     | 0.31 | 5.535  | 5.392  | 5.215  | 7.092  | 6.383  | 7.555  | 0.0337 |
| UPP1      | 0.31 | 10.321 | 10.347 | 10.186 | 11.901 | 12.151 | 11.917 | 0.0002 |
| PPP1R15A  | 0.30 | 8.390  | 8.364  | 7.833  | 9.970  | 9.823  | 10.001 | 0.0067 |
| AGR2      | 0.30 | 7.517  | 8.014  | 7.119  | 9.153  | 9.602  | 9.138  | 0.0082 |
| HSPB8     | 0.30 | 4.128  | 4.401  | 4.139  | 5.725  | 6.241  | 5.836  | 0.0020 |



|        |      |       |       |       |        |        |        |        |
|--------|------|-------|-------|-------|--------|--------|--------|--------|
| DNAJB9 | 0.30 | 6.694 | 7.732 | 6.625 | 8.570  | 9.224  | 8.621  | 0.0198 |
| SQSTM1 | 0.30 | 9.297 | 9.327 | 9.271 | 10.834 | 11.282 | 10.986 | 0.0052 |
| CLDN1  | 0.29 | 7.639 | 7.901 | 6.910 | 9.403  | 9.231  | 9.331  | 0.0226 |
| KRT80  | 0.29 | 9.206 | 9.118 | 9.085 | 10.934 | 10.845 | 11.023 | 0.0000 |
| DUSP8  | 0.28 | 5.598 | 5.642 | 5.558 | 7.518  | 6.794  | 7.757  | 0.0254 |
| ISG20  | 0.28 | 5.465 | 5.654 | 5.145 | 7.119  | 7.468  | 7.144  | 0.0009 |
| UPP1   | 0.28 | 9.023 | 9.275 | 9.076 | 10.773 | 11.239 | 10.876 | 0.0013 |
| ARG2   | 0.28 | 6.888 | 7.392 | 6.231 | 8.652  | 8.898  | 8.742  | 0.0249 |
| PRSS1  | 0.27 | 7.093 | 7.964 | 7.324 | 9.329  | 9.307  | 9.577  | 0.0111 |
| PEAR1  | 0.26 | 4.527 | 4.672 | 4.486 | 6.642  | 6.080  | 6.684  | 0.0066 |
| ETS1   | 0.26 | 5.979 | 5.624 | 6.240 | 8.021  | 7.954  | 7.765  | 0.0031 |
| MAFF   | 0.26 | 7.213 | 7.141 | 6.785 | 9.109  | 8.581  | 9.285  | 0.0029 |
| CYR61  | 0.26 | 7.429 | 7.000 | 7.207 | 9.470  | 8.264  | 9.518  | 0.0358 |
| CYR61  | 0.23 | 7.424 | 7.101 | 7.195 | 9.582  | 8.419  | 9.794  | 0.0364 |
| ETS1   | 0.22 | 8.839 | 8.883 | 8.825 | 11.133 | 11.075 | 10.828 | 0.0014 |
| IL20RB | 0.21 | 3.877 | 4.433 | 3.642 | 6.533  | 5.909  | 6.231  | 0.0021 |
| CTGF   | 0.20 | 6.484 | 6.003 | 5.362 | 8.681  | 7.108  | 8.678  | 0.0313 |
| ATF3   | 0.20 | 6.611 | 6.053 | 5.673 | 8.743  | 7.536  | 8.863  | 0.0155 |
| ATF3   | 0.18 | 7.412 | 7.155 | 6.339 | 9.607  | 8.266  | 10.032 | 0.0282 |
| ATF3   | 0.18 | 8.739 | 8.586 | 7.651 | 11.042 | 9.821  | 11.281 | 0.0157 |
| ATF3   | 0.17 | 8.087 | 7.889 | 6.915 | 10.373 | 9.192  | 10.723 | 0.0155 |
| LAMP3  | 0.16 | 5.645 | 6.130 | 5.558 | 8.189  | 8.835  | 8.227  | 0.0007 |
| DUSP1  | 0.15 | 6.512 | 6.332 | 5.962 | 9.228  | 8.194  | 9.297  | 0.0084 |
| DUSP1  | 0.13 | 6.204 | 6.492 | 5.874 | 9.041  | 8.472  | 9.618  | 0.0044 |

Note: GS= Gene Symbol, FC= Fold change, T-1= ZLD1039\_Treat\_1, CTL-1= Control\_1, the differential genes were filtered by fold-change > 2 and *P* value < 0.05.
